1                   **Impaired iron recycling from erythrocytes is an early hallmark of aging**

2  
3    Patryk Slusarczyk<sup>1\*</sup>, Pratik Kumar Mandal<sup>1\*</sup>, Gabriela Zurawska<sup>1</sup>, Marta Niklewicz<sup>1</sup>, Komal Kumari  
4    Chouhan<sup>1</sup>, Matylda Macias<sup>1</sup>, Aleksandra Szybinska<sup>1</sup>, Magdalena Cybulska<sup>2</sup>, Olga Krawczyk<sup>2</sup>, Sylwia  
5    Herman<sup>3</sup>, Michal Mikula<sup>2</sup>, Remigiusz Serwa<sup>4,5</sup>, Malgorzata Lenartowicz<sup>3</sup>, Wojciech Pokrzywa<sup>1</sup> and  
6    Katarzyna Mleczko-Sanecka<sup>1#</sup>

7    <sup>1</sup> International Institute of Molecular and Cell Biology in Warsaw, Poland

8    <sup>2</sup> Maria Sklodowska-Curie National Research Institute of Oncology, Warsaw, Poland

9    <sup>3</sup> Department of Genetics and Evolution, Institute of Zoology and Biomedical Research, Jagiellonian  
10    University, Cracow, Poland

11   <sup>4</sup> IMol Polish Academy of Sciences, Warsaw, Poland

12   <sup>5</sup> ReMedy International Research Agenda Unit, IMol Polish Academy of Sciences, Warsaw, Poland

13  
14   \* equal contribution

15  
16   # To whom correspondence may be addressed:

17   Katarzyna Mleczko-Sanecka, International Institute of Molecular and Cell Biology,

18   4 Ks. Trojdena Street, 02-109 Warsaw, Poland Tel.: (+48 22) 597 07 00.

19   Fax: (+48 22) 597 07 15. E-mail: [kmsanecka@iimcb.gov.pl](mailto:kmsanecka@iimcb.gov.pl)

1 **Abstract**

2 Aging affects iron homeostasis, as evidenced by tissue iron loading and toxicity and common anemia in  
3 the elderly. Iron needs in mammals are met primarily by iron-recycling from senescent red blood cells  
4 (RBCs), a task chiefly accomplished by splenic red pulp macrophages (RPMs) via erythrophagocytosis.  
5 Given that RPMs continuously process iron, their cellular functions might be susceptible to age-  
6 dependent decline, a condition that has been largely unexplored to date. Here, we found that 10-11-  
7 months-old female mice exhibit iron loading, diminished lysosomal activity, and decreased  
8 erythrophagocytosis rate in RPMs. These impairments lead to the retention of senescent hemolytic RBCs  
9 in the spleen, and the formation of undegradable iron- and heme-rich extracellular protein aggregates,  
10 likely derived from ferroptotic RPMs. We further found that feeding mice an iron-reduced diet alleviates  
11 iron accumulation in RPMs, enhances their ability to clear erythrocytes, and limits ferroptosis.  
12 Consequently, this diet ameliorates hemolysis of splenic RBCs and the formation of iron-rich  
13 aggregates, increasing serum iron availability in aging mice. Using RPM-like cells, we show that the  
14 diminished iron-recycling capacity of RPMs is underlain by iron accumulation and reduced expression  
15 of heme-catabolizing enzyme heme oxygenase 1 (HO-1). Taken together, we identified RPM collapse  
16 as an early hallmark of aging and demonstrated that dietary iron reduction improves iron turnover  
17 efficacy.

18

19

20

21

22

23

24

25

26

27

28

29

30

31

## 1 Introduction

2 Sufficient iron supplies are critical for cellular metabolic functions and red blood cells (RBCs)  
3 production (Cronin et al., 2019; Muckenthaler et al., 2017). As a key constituent of heme - a prosthetic  
4 group of hemoglobin, iron confers the unique capability of RBCs to shuffle oxygen and carbon dioxide  
5 between the lungs and tissues (Slusarczyk and Mleczko-Sanecka, 2021). At the systemic level, 80% of  
6 circulating iron is utilized for hemoglobin synthesis during the daily generation of approximately 200  
7 billion RBCs (Muckenthaler et al., 2017). Hence, in mammals, hemoglobin accounts for the largest pool  
8 of heme and iron in the body (Hamza and Dailey, 2012). The oxygen-carrying capacity of RBCs renders  
9 them sensitive to the progressive build-up of reactive oxygen species (ROS) that drive natural RBCs  
10 senescence (Bratosin et al., 1998). Due to the prooxidative properties of free heme and iron, the  
11 exceedingly high hemoglobin content in senescent RBCs constitutes a threat to other cells in the event  
12 of RBC breakdown. To reduce the risk of RBCs disintegrating in the blood vessels and because  
13 mammals evolved under limited dietary iron availability, 90% of the body iron needs are met by internal  
14 iron recycling from aged RBCs (Ganz, 2012). This task is accomplished predominantly by red pulp  
15 macrophages (RPMs) of the spleen, cells that recognize and engulf defective RBCs in the process called  
16 erythrophagocytosis (EP) (Bian et al., 2016; Youssef et al., 2018).

17 The loss of elasticity is a key feature of naturally aged RBCs (Bratosin et al., 1998; Higgins, 2015; Lutz,  
18 2012). One of the underlying mechanisms is the oxidation and denaturation of hemoglobin, as well as  
19 the formation of lipid peroxides (Arashiki et al., 2013; Ganz, 2012). Once RBCs become too rigid to  
20 pass through slits within the red pulp's unique venous system, they are retained within the spleen cords  
21 (Mebius and Kraal, 2005). Recognition of "trapped" RBCs by RPMs involves additional signals  
22 proposed to act additively (Gottlieb et al., 2012; Slusarczyk and Mleczko-Sanecka, 2021). Upon  
23 engulfment by RPMs, RBCs are degraded in phagolysosomes, globins are hydrolyzed to amino acids,  
24 and heme is released (Klei et al., 2017). Recent findings suggest that in addition to phagocytosis, part  
25 of the RBC-derived iron is recovered via hemolysis of RBCs within the splenic microenvironment and  
26 subsequent endocytic hemoglobin uptake (Klei et al., 2020). In RPMs, heme is transported from  
27 phagolysosomes or late endosomes to the cytoplasm by HRG1 (Pek et al., 2019) and subsequently  
28 catabolized by heme oxygenase 1 (HO-1; encoded by *Hmox-1*) to carbon monoxide (CO), biliverdin,  
29 and ferrous iron that feeds the labile iron pool (LIP) (Kovtunovych et al., 2010). The nanocage-like  
30 protein ferritin sequesters iron from the LIP. Iron efflux from RPMs occurs via ferroportin (FPN) to  
31 replenish the transferrin-bound iron pool in the plasma (Muckenthaler et al., 2017; Zhang et al., 2011).  
32 The process of iron release from RPMs is tightly regulated by hepcidin, a small liver-derived hormone  
33 that mediates FPN degradation and/or occlusion, hence preventing iron release from the RPMs iron  
34 reservoir (Aschemeyer et al., 2018; Nemeth et al., 2004). Despite the growing body of knowledge, it is  
35 still insufficiently explored how iron balance in RPMs is affected by different pathophysiological  
36 conditions and how it may influence their functions.

1 Similar to erythropoiesis, the rate of RBCs sequestration is very high, reaching 2-3 million per second  
2 in humans (Higgins, 2015), and mainly considered constitutive under physiological conditions. Some  
3 reports showed that the intensity of EP can be enhanced by proinflammatory conditions and pathogen  
4 components (Bennett et al., 2019; Bian et al., 2016; Delaby et al., 2012). Recent work employing genetic  
5 mouse models showed that altered calcium signaling in RPMs due to overactivation of the PIEZO1  
6 mechanoreceptor (Ma et al., 2021) or deficiency of the IL-33 receptor IL1RL1 (Lu et al., 2020), induces  
7 or represses EP rate, respectively. However, it is largely unknown if the RBCs uptake and degradation  
8 within the phagolysosomes are regulated by intrinsic or systemic iron status *per se*.  
9 Iron dyshomeostasis hallmarks physiological aging. This is exemplified by progressive iron  
10 accumulation and iron-dependent oxidative damage in aging organs, such as the brain, liver, spleen,  
11 kidney, skeletal muscles, or heart (Arruda et al., 2013; Cook and Yu, 1998; Sukumaran et al., 2017; Xu  
12 et al., 2008). At the same time, plasma iron deficiency is frequent in aged individuals and is a leading  
13 cause of a condition referred to as anemia in the elderly (Girelli et al., 2018). RPMs are derived from  
14 embryonic progenitor cells (Yona et al., 2013), exhibit limited self-renewal capacity (Hashimoto et al.,  
15 2013), and are only partially replenished by blood monocytes during aging (Liu et al., 2019). Hence,  
16 these specialized cells continuously perform senescent RBCs clearance during their lifespan, thus  
17 processing and providing most of the iron the organism utilizes. We hypothesized that this might render  
18 RPMs particularly susceptible to age-related iron-triggered functional deterioration, affecting body iron  
19 indices and RBCs homeostasis. Here, we found that aging impairs the capacity of RPMs to engulf and  
20 lyse RBCs and promotes their loss, likely via ferroptosis. We propose that these defects affect local  
21 RBCs' balance in the spleen, augmenting the degree of their lysis, and promote the formation of iron-  
22 and heme-rich extracellular protein aggregates. We decipher new mechanisms of EP regulation by an  
23 interplay between intracellular iron levels, HO-1 activity, and proteotoxic endoplasmic reticulum (ER)  
24 stress. Finally, we provide evidence that reducing dietary iron during aging “rejuvenates” RPMs  
25 function and improves iron homeostasis.

## 26 **Results**

### 27 **RPMs of aged mice show increased labile iron levels, oxidative stress and diminished iron- 28 recycling functions**

29 To investigate iron recycling capacity during aging, we used 10-11-month-old mice fed a diet with  
30 standard iron content (200 ppm). We used female mice as they show a higher iron burden in the spleen  
31 with age progression (Altamura et al., 2014). This age in mice corresponds to approximately 40-45 years  
32 in humans when senescent changes begin to occur (Fox, 2006). As expected, aged mice show tissue iron  
33 loading, with the spleen being most affected, followed by the liver and other organs such as muscles and  
34 the heart (Fig. S1A-D). Aging mice exhibit decreased blood hemoglobin values, as previously shown  
35 (Peters et al., 2008), and a drop in transferrin saturation, a feature that thus far was observed mostly in

1 elderly humans (Fig. S1E and F) (Girelli et al., 2018). Next, we aimed to verify if aging affects the iron  
2 status and essential cellular functions of RPMs. Ferritin is an iron-storing heteropolymer composed of  
3 H and L subunits. Due to its ferroxidase activity, H ferritin is a key endogenous protective protein that  
4 converts redox-active ferrous iron to inert ferric iron retained inside the ferritin shells (Mleczko-Sanecka  
5 and Silvestri, 2021). Using intracellular staining and flow cytometric analyses, we uncovered that RPMs  
6 [gated as CD11b-dim, F4/80-high, TREML4-high (Halder et al., 2014); Fig. S2] in aged mice exhibit a  
7 significant deficiency in H ferritin levels, with unchanged L ferritin protein expression (Fig. S1G and  
8 H). Consistently, using the fluorescent probe FerroOrange that interacts explicitly with ferrous iron, we  
9 detected a significant increase in LIP in aged RPMs (Fig. S1I) accompanied by marked oxidative stress  
10 (detected using CellROX probe; Fig. S1J). We next tested if this increase in labile iron in RPMs would  
11 impact the phagocytic activity. Hence, we incubated splenic single-cell suspension with temperature-  
12 stressed RBCs fluorescently labeled with PKH67 dye (Klei et al., 2020; Theurl et al., 2016). In parallel,  
13 we employed another standard cargo for phagocytosis, zymosan, a yeast cell wall component. Using  
14 this *ex vivo* approach, we detected a significant drop in RBCs clearance rate in aged compared to young  
15 RPMs (Fig. S1K). Notably, their capacity for the engulfment of zymosan remained unchanged (Fig.  
16 S1L), thus suggesting a specific defect of EP in aged RPMs. Using a fluorescent probe, we also observed  
17 decreased lysosomal activity in RPMs isolated from 10-11-months old mice compared to those derived  
18 from young control animals (Fig. S1M). Interestingly, peritoneal macrophages of aged mice did not  
19 show altered ROS levels or diminished functions of lysosomes and mitochondria (Fig. S3), suggesting  
20 that these age-related changes affect RPMs earlier than other macrophage populations. Altogether, these  
21 insights suggest that during aging, RPMs increase LIP and exhibit a reduced capacity for the RBCs  
22 engulfment and lysosomal degradation of erythrocyte components.

### 23 **Iron-reduced diet normalizes body iron parameters during aging, diminishes iron retention in** 24 **RPMs, and rescues age-related decline in their iron-recycling capacity**

25 We next set out to explore whether an age-related redistribution of iron from plasma to organs,  
26 particularly the spleen, could be prevented. Caloric restriction was previously shown to effectively  
27 reduce tissue iron content in older rats in organs such as muscle, kidney, liver, and brain (Cook and Yu,  
28 1998; Xu et al., 2008). To target iron dyshomeostasis in aging mice, we applied an alternative approach  
29 by reducing dietary iron from the fifth week of life to a level (25 ppm) that was reported as sufficient to  
30 maintain erythropoiesis (Sorbie and Valberg, 1974). This approach reverted the degree of iron  
31 deposition in the spleen and liver (Fig. 1A and B) and partially alleviated the decreased transferrin  
32 saturation characteristic of aged mice fed a standard diet (Fig. 1C). Notably, the mild drop in blood  
33 hemoglobin was not rescued by the iron-reduced (IR) diet (Fig. S4A). Consistently, extramedullary  
34 erythropoiesis in the spleen and increased plasma erythropoietin (EPO) levels in aged mice were not  
35 affected by dietary iron content (Fig. S4B and C). These observations imply that partial alleviation of  
36 plasma iron availability in IR mice is insufficient to correct mild aging-triggered anemia and/or other

1 hematopoiesis-related mechanisms may contribute to this phenotype. Next, we observed that hepcidin  
2 mRNA levels in the liver reflected, as expected, the degree of hepatic iron deposition in mice that were  
3 aged on the standard and IR diets (Fig. 1D). The alterations in hepcidin expression levels were reflected  
4 by the changes in FPN levels on the surface of RPMs, as indicated by flow cytometry analyses using an  
5 antibody that recognizes the extracellular loop of murine FPN (Fig. 1E) (Sangkhae et al., 2019). Hence,  
6 we further characterized RPMs' iron status. We found that despite decreased ferritin H levels in aged  
7 mice, regardless of the dietary regimen (Fig. 1F), accumulation of both labile iron (measured using  
8 FerroOrange and flow cytometry; Fig. 1G) and total iron (measured by colorimetric assay in  
9 magnetically-sorted RPMs, Fig. 1H) is completely reversed in RPMs in aged mice fed an IR diet as  
10 compared to a standard diet. Likewise, we observed alleviation of oxidative stress in RPMs, using a pan-  
11 ROS fluorescent probe CellROX (Fig. 1I).

12 The major function of RPMs is the clearance of aged erythrocytes. We thus explored if their altered iron  
13 status in aged mice reflects their capacity to engulf and degrade RBCs. To this end, we first performed  
14 *in vivo* erythrophagocytosis assay via transfusion of PKH67-stained temperature-stressed erythrocytes  
15 (Lu et al., 2020; Theurl et al., 2016). We identified a significant reduction in the capacity of RPMs to  
16 sequester RBCs in aged mice, an impairment that was partially rescued by feeding mice an IR diet (Fig.  
17 1J). Similarly to the EP rate, we found that RPMs isolated from aged IR mice restored the lysosomal  
18 activity to the levels observed in young mice (Fig. 1K). These data imply that the diminished capacity  
19 of RPMs to sequester and lyse RBCs during aging can be ameliorated by limiting dietary iron content.  
20 Since earlier studies demonstrated that under conditions of RPMs impairment, iron-recycling functions  
21 are significantly supported by liver macrophages (Lu et al., 2020; Theurl et al., 2016), we also measured  
22 their EP rate during aging. Using the transfusion of PKH67-stained RBCs (Akilesh et al., 2019) we  
23 found no increase in Kupffer cells (KCs) EP capacity in mice fed IR (Fig. 1L). However, consistently  
24 with the *de novo* recruitment of iron-recycling myeloid cells to the liver upon erythrocytic stress (Theurl  
25 et al., 2016), we detected a significant expansion of the KC-like population in aged mice but not in the  
26 aged IR group (Fig. 1M), suggesting that by this means, the liver macrophage may partially compensate  
27 for the reduced EP activity in RPMs. In support of the model that “on-demand” hepatic iron-recycling  
28 macrophages support iron recycling during aging, and in agreement with the previous findings that iron  
29 from engulfed RBCs is stored in hepatocytes (Theurl et al., 2016), we observed progressive liver iron  
30 accumulation with age (Fig. 1N). In sum, we demonstrate that dietary iron restriction normalizes both  
31 systemic and RPMs iron levels, thus preventing the onset of cellular oxidative stress in RPMs of aged  
32 mice and rescuing their age-related decline in iron-recycling capacity.

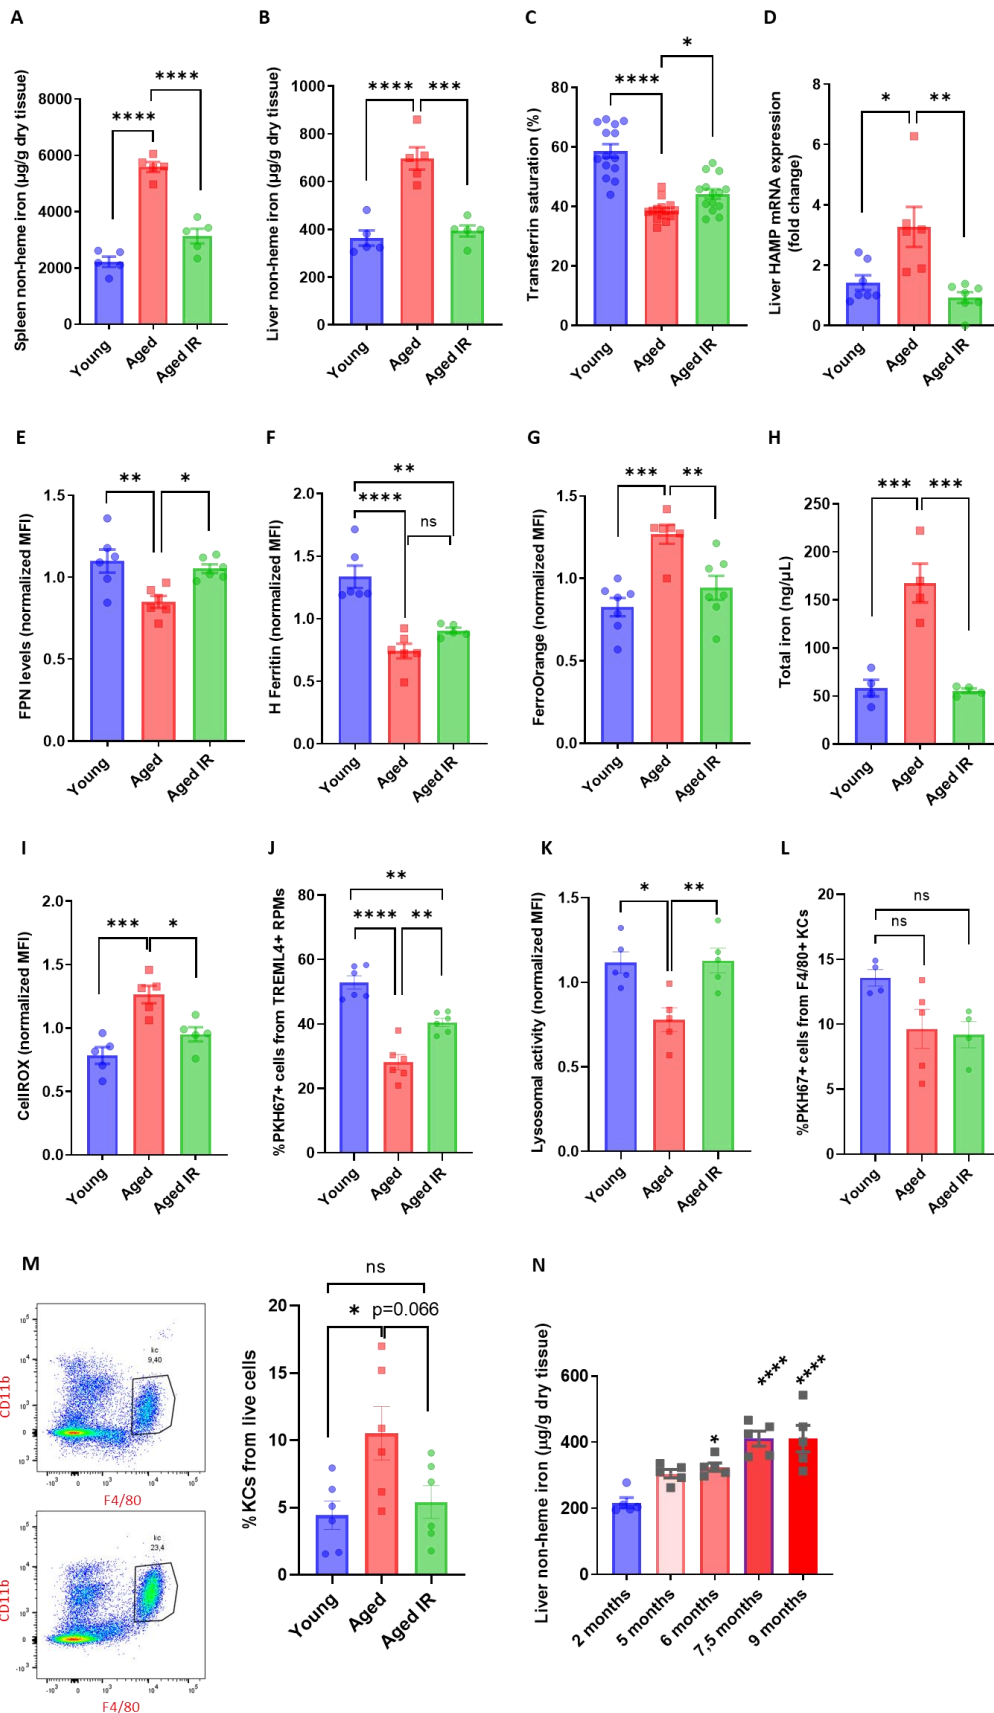

1  
2 **Figure 1. Iron-reduced diet normalizes body iron parameters during aging, diminishes iron retention in RPMs,**  
3 **and rescues age-related decline in their iron-recycling capacity.**

4 (A) Splenic and (B) hepatic non-heme iron content was determined in young, aged, and aged IR mice.

5 (C) Plasma transferrin saturation was determined in young, aged, and aged IR mice.

- 1 (D) Relative mRNA expression of hepcidin (Hamp) in the liver was determined by qPCR.  
2 (E) Cell surface ferroportin expression in young, aged, and aged IR RPMs was assessed by flow cytometry.  
3 (F) H-Ferritin protein levels in young, aged, and aged IR RPMs were quantified by flow cytometric analysis.  
4 (G) Cytosolic ferrous iron (Fe<sup>2+</sup>) levels in young, aged, and aged IR RPMs were measured using FerroOrange and flow  
5 cytometry.  
6 (H) The total intracellular iron content in young, aged, and aged IR magnetically-sorter RPMs was assessed using a commercial  
7 assay and normalized to cell number.  
8 (I) The cytosolic ROS levels in young, aged, and aged IR RPMs were assessed by determining CellROX Deep Red fluorescence  
9 intensity with flow cytometry.  
10 (J) RBC clearance capacity in young, aged, and aged IR RPMs was determined by measuring the percentage of RPMs that  
11 phagocytosed transfused PKH67-labeled temperature-stressed RBCs.  
12 (K) The lysosomal activity of young, aged, and aged IR RPMs was determined using a dedicated fluorescent probe and flow  
13 cytometry.  
14 (L) The phagocytosis rate of transfused PKH67-labeled temperature-stressed RBCs by Kupffer cells (KCs) in young, aged, and  
15 aged IR mice was measured with flow cytometry analysis.  
16 (M) Representative flow cytometry plots of KCs and percentages of KCs out of total live cells in livers of young, aged, and aged  
17 IR mice.  
18 (N) Liver non-heme iron content was determined in mice at the indicated age.  
19 Each dot represents one mouse. Data are represented as mean ± SEM. Statistical significance among the three or more groups  
20 was determined by One-Way ANOVA test with Tukey's Multiple Comparison test. \*p<=0.05, \*\*p<=0.01, \*\*\*p<=0.001 and  
21 \*\*\*\*p<=0.0001

## 22 **Aging triggers retention of senescent RBCs, increased hemolysis, and the formation of non-** 23 **degradable iron-rich aggregates in the spleen**

24 Having established that dietary iron content in aging modulates RPMs EP capacity (Fig. 1J), we  
25 examined parameters related to RBCs fitness. First, we performed an RBCs lifespan assay and found no  
26 differences in the rate of RBCs removal from the circulation between young and aged mice (Fig. 2A).  
27 However, defective RBCs are first filtered in the spleen due to the loss of their elasticity, and this step  
28 is a prerequisite for their removal via EP (Slusarczyk and Mleczko-Sanecka, 2021). In agreement with  
29 this model, RBCs retained in the spleen of young mice show ROS build-up, a marker of their senescence  
30 (Bratosin et al., 1998), compared to the circulating RBCs (Fig. 2B and S5). We thus hypothesized that  
31 reduced phagocytic capacity of RPMs in aging might impact local rather than systemic RBCs  
32 homeostasis. Consistently, splenic RBCs isolated from older mice show more pronounced ROS levels  
33 than RBCs derived from young mice (Fig. 2C). In line with the partial mitigation of the defective EP  
34 capacity (Fig. 1J), we found that mice fed an IR diet exhibited erythrocytic oxidative stress parameters  
35 as the young mice (Fig. 2D). Since ROS can accumulate in RBCs with deficient FPN (Zhang et al.,  
36 2018), we examined FPN levels of splenic RBCs. We found no reduction but a significant FPN increase  
37 in aged mice, implying that increased erythrocytic ROS are not caused by alterations in FPN levels (Fig.  
38 2E). Furthermore, in agreement with the notion that a part of senescent splenic RBCs undergoes  
39 hemolysis (Klei et al., 2020), we detected significantly higher levels of extracellular heme in the aged  
40 spleens, likely reflecting a higher burden of defective RBCs that escape EP (Fig. 2F). Interestingly, we  
41 found that the levels of this free heme in aging spleens are partially rescued by the IR diet. In conclusion,  
42 our data suggest that reduced EP rate during aging may promote the splenic retention of senescent RBCs  
43 prone to undergo local lysis and that these physiological changes may be partially rescued by  
44 maintaining mice on an IR diet.



1 Previous work showed that genetic deletion of SPI-C, the transcription factor that confers RPMs  
2 functional identity (Haldar et al., 2014; Kohyama et al., 2009), leads to the gradual loss of RPMs in  
3 young postnatal mice (Okreglicka et al., 2021). The knock-out of *Pparg*, a factor required for neonatal  
4 RPM expansion, is manifested by a profound depletion of RPMs (Okreglicka et al., 2021), whereas low  
5 numbers of fully differentiated RPMs and their compromised EP capacity hallmark the genetic  
6 abrogation of the IL-33-IL1RL1 pathway (Lu et al., 2020). A common denominator for all these distinct  
7 mouse models is iron accumulation in the spleen, implying that splenic iron overload may result from  
8 diminished RPMs functionality. We thus aimed to explore the identity of splenic iron deposits in more  
9 detail. Perls' Prussian blue staining of spleen sections showed that aged mice on a standard diet exhibit  
10 enhanced iron accumulation in the red pulp, a less pronounced phenotype in mice fed an IR diet (Fig.  
11 2G). This primarily reflects RPMs iron status (Fig. 1G and H). We also detected dispersed large iron-  
12 loaded cells in the white pulp of aged mice fed a standard diet which were absent in young and iron-  
13 reduced mice (Fig. 2G). Intriguingly, eosin/hematoxylin staining visualized deposits in aged spleens  
14 that, in contrast to Perls' staining, were completely absent in young controls (Fig. 2H). They appear as  
15 large and extracellular in the histology sections and seem smaller and less abundant in mice fed an IR  
16 diet (Fig. 2H). Flow cytometry analyses confirmed that splenic single-cell suspension from aged but not  
17 young mice contains superparamagnetic particles, likely rich in iron oxide (Franken et al., 2015), that  
18 are characterized by high granularity as indicated by the SSC-A signal. These particles do not show  
19 staining indicative of dead cells and fail to express typical splenocyte and erythroid markers (CD45,  
20 TER119, CD11b or F4/80) (Fig. 2I). With different granularity and size parameters, such particles  
21 appear as well in mice aged on an IR diet, however, to a lesser extent. We established a strategy  
22 involving splenocyte separation in the lymphocyte separation medium followed by magnetic sorting,  
23 which successfully separates iron-rich cells (chiefly RPMs) from iron-containing extracellular  
24 aggregates (Fig. S6). We found that these aggregates contain large amounts of total iron (Fig. 2J) and,  
25 interestingly, heme (Fig. 2K), implying their partial RBC origin. Importantly, both iron and heme  
26 content is significantly reduced in mice fed an IR diet. In sum, our data show that aging is associated  
27 with local RBC dyshomeostasis in the spleen, and the formation of iron- and heme-rich aggregates, and  
28 that both these responses can be alleviated by limiting dietary iron content.

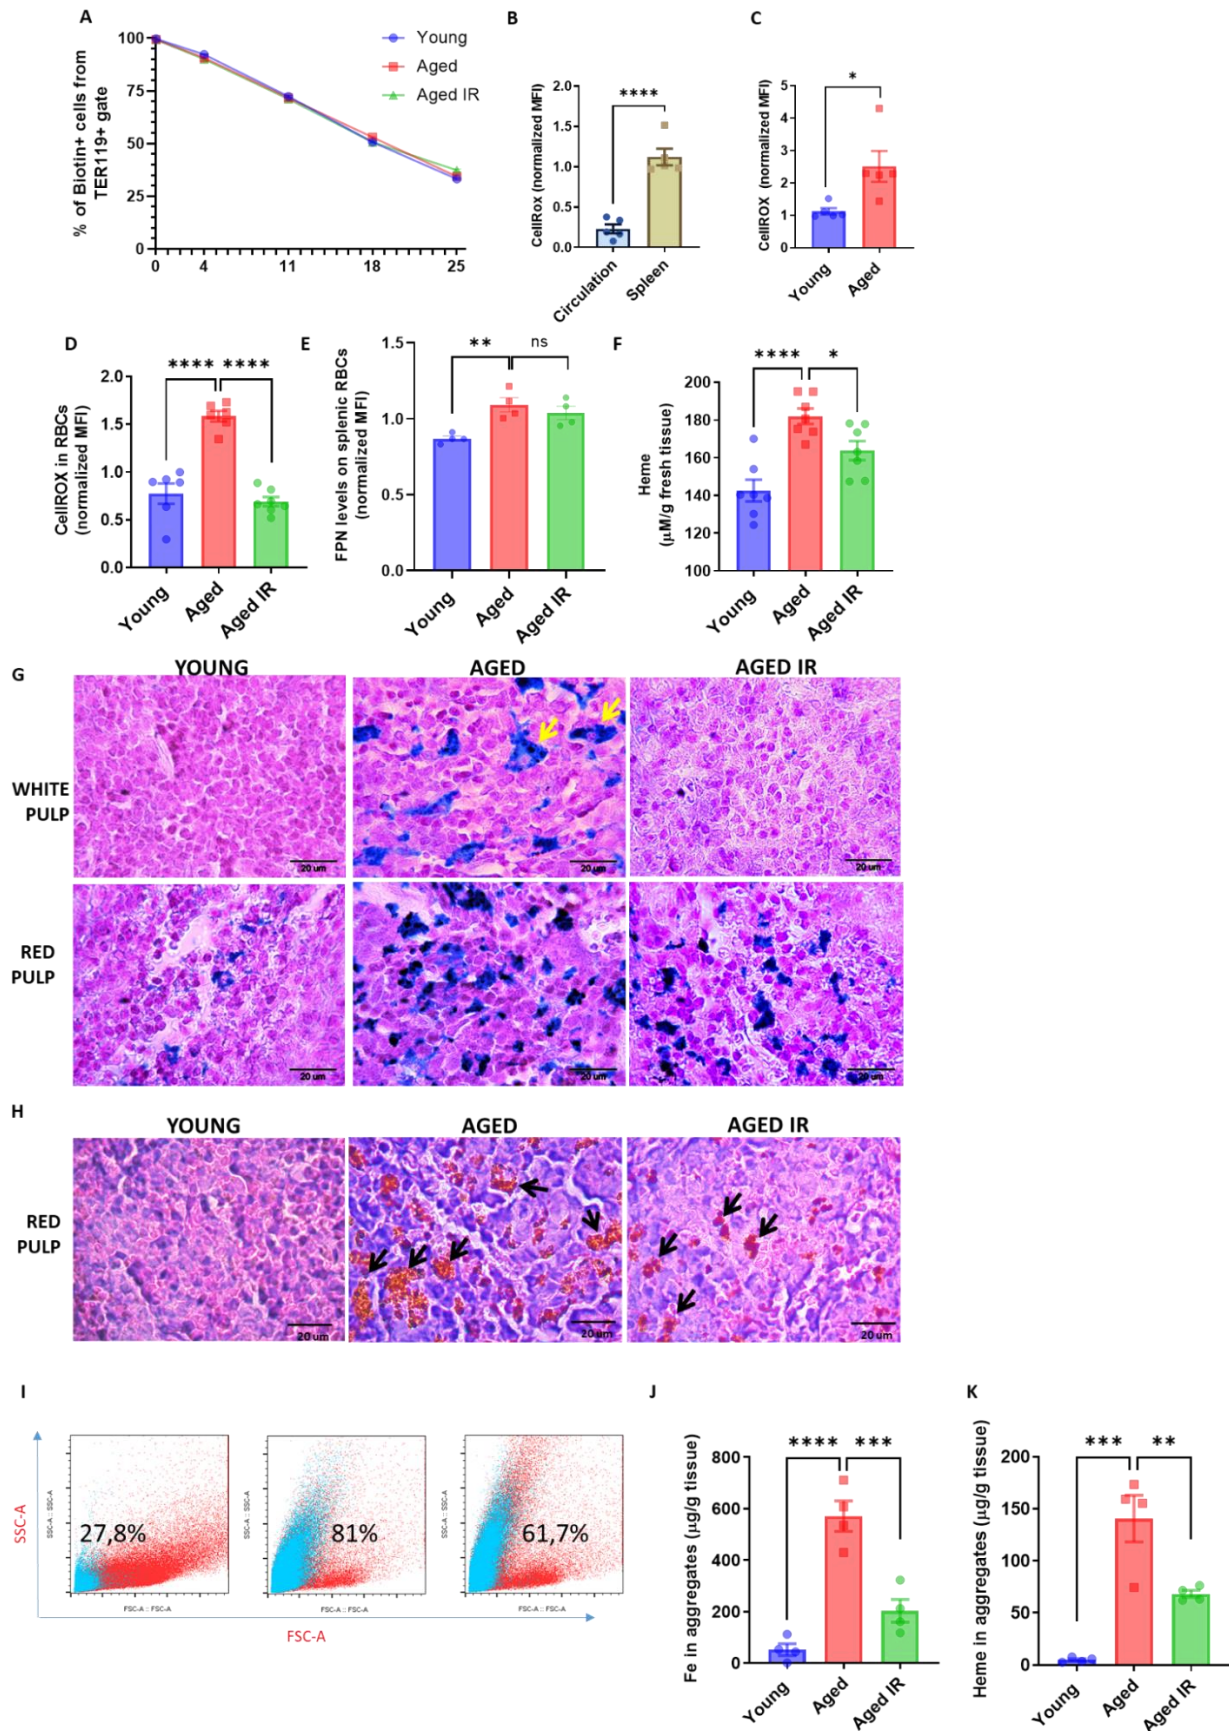

1  
2  
3  
4

**Figure 2. Aging triggers retention of senescent RBCs, increased hemolysis, and the formation of non-degradable iron-rich aggregates in the spleen.**

1 (A) The RBC biotinylation assay was performed on circulating RBCs from young, aged, and aged IR mice. (B-D) The cytosolic  
2 ROS levels in RBCs derived from (B) circulation and the spleen of young mice; (C) the spleen of young and aged mice; (D) the  
3 spleen of young, aged, and aged IR mice. Levels of ROS were estimated by determining CellROX Deep Red fluorescence  
4 intensity with flow cytometry.  
5 (E) Expression of ferroportin on the surface of RBCs obtained from the spleen of young, aged, and aged IR mice assessed by  
6 flow cytometry.  
7 (F) Extracellular heme levels were measured in the medium obtained after dissociation of spleens from young, aged, and  
8 aged IR mice using Heme Assay Kit.  
9 (G) Perls' Prussian Blue staining of the splenic white and red pulp in young, aged, and aged IR mice. Arrows indicate cells with  
10 ferric iron deposits in the white pulp.  
11 (H) Hematoxylin/eosin staining of the splenic red pulp in young, aged, and aged IR mice. Arrows indicate extracellular brown  
12 aggregates.  
13 (I) Representative flow cytometry plots of magnetically-sorted splenocytes. In blue are events adverse for dead cell staining  
14 and cell surface markers CD45, TER119, CD11b, and F4/80. The percentage of these events in total acquired events is  
15 indicated.  
16 (J) The total iron content in magnetically-sorted, cell-free aggregates derived from spleens of young, aged, and aged IR RPMs  
17 mice was assessed using a commercial assay.  
18 (K) The heme content in magnetically-sorted, cell-free aggregates derived from spleens of young, aged, and aged IR RPMs  
19 mice was assessed using Heme Assay Kit.

20  
21 Each dot in the graph (A) represents n=8. For the other panels, each dot represents one mouse. Data are represented as  
22 mean  $\pm$  SEM. Welch's unpaired t-test determined statistical significance between the two groups; for the three groups, One-  
23 Way ANOVA with Tukey's Multiple Comparison test was applied. \* $p < 0.05$ , \*\* $p < 0.01$ , \*\*\* $p < 0.001$  and \*\*\*\* $p < 0.0001$

24  
25 **Splenic age-triggered iron deposits are rich in aggregation-prone protein debris that likely**  
26 **emerges from dysfunctional and damaged RPMs**

27 We next sought to explore the origin of the splenic iron aggregates. We imaged spleen sections from  
28 young and aged mice with transmission electron microscopy (TEM) to obtain ultrastructural  
29 information. We noticed that RPMs in young mice contain only intracellular dark-colored deposits, rich  
30 in structures that resemble ferritin (Fig.3 Ai). Their appearance likely mirrors a form of iron deposits  
31 that were in the past referred to as hemosiderin, an intracellular clustered insoluble degradation product  
32 of ferritin (Harrison and Arosio, 1996; Ward et al., 2000). In older mice, we likewise observed  
33 intracellular deposits in morphologically vital cells (Fig. 3Aii). However, in agreement with histological  
34 staining, we detected two other classes of aggregates: those that are still granular and enclosed within  
35 the membrane, but present in cells that are morphologically damaged (Fig. 3Aiii) and those that are  
36 large, amorphous, and located extracellularly (Fig. 3Aiv). Next, we conducted label-free proteomic  
37 profiling to determine the composition of magnetically-isolated aging-associated splenic aggregates. We  
38 identified over 3770 protein groups, among which 3290 were significantly more abundant in isolates  
39 from aged mice compared with the samples derived from young mice (Fig. 3B, Table S1). We assume  
40 that low-level detection of peptides from the young spleens may represent reminiscence from  
41 intracellular deposits that we observed via TEM and which may be released from RPMs during  
42 splenocyte processing. We performed a functional enrichment analysis of the top 387 hits ( $\log_2$  fold  
43 change  $> 5$ ) with DAVID and ShinyGO (Fig. 3B and C). We first noticed that although the identified  
44 proteins are enriched with components of several organelles, including lysosomes, ER, mitochondria,  
45 but also nucleus, and extracellular space, one of the top characteristics that they share is a disordered  
46 region in their amino acid sequence, a factor that may increase the risk of protein aggregation (Uversky,

1 2009). Consistently, the top hits are enriched in proteins related to neurodegeneration pathways,  
2 amyotrophic lateral sclerosis, Huntington's disease, and heat shock protein binding, linking their origin  
3 to proteostasis defects (Medinas et al., 2017). For example, these include huntingtin (HTT) and ataxin  
4 3 (ATXN3), the latter underlying spinocerebellar ataxia-3, both proteins prone to polyglutamine track  
5 expansion, and calpain (CAPN2), a protease implicated in neuronal cell death in neurodegeneration  
6 (Camins et al., 2006; Lieberman et al., 2019) (Fig. 3B). In agreement with the substantial iron load of  
7 the aggregates and the fact that iron promotes protein aggregation (Klang et al., 2014), we identified  
8 “metal-binding” as another significant functional enrichment. Furthermore, we observed that the top  
9 components of the aggregates include several proteins associated with immunoglobulin-like domains  
10 (Fig. 3B), such as 15 antibody chain fragments as well as 2 Fc receptors, proteins associated with  
11 complement activation and phagocytosis, thus linking the aggregates to the removal of defective cells,  
12 likely senescent RBCs or damaged RPMs. Finally, consistent with our data from EM imaging that cell  
13 death likely contributes to the formation of the aggregates (Fig. 3Aiv), their top components are enriched  
14 with apoptosis-related protein (e.g. BID, DFFA, DAXX, and MRCH1; Fig. 3B) and those linked to the  
15 response to stress. To explore how limited dietary iron content during aging affects the formation of the  
16 splenic iron-rich deposits, we conducted TMT-based proteomic quantification of their composition. Out  
17 of 942 detected protein groups, 50 hits were significantly more abundant in magnetically-isolated  
18 aggregates from the aged mice than mice fed an iron-reduced diet (Fig. 3D, Table S2). Functional  
19 enrichment analysis revealed that proteins related to phagosomes, response to stress, or necroptosis  
20 distinguish the rescued mice from those aged on a standard diet (Fig. 3E). Interestingly, however, this  
21 analysis identified components of lysosomes as by far the most overrepresented hits (Fig. 3D and E),  
22 suggesting that alleviation of the lysosomal defects (Fig. 1K) likely contributes to less pronounced  
23 aggregates formation in iron-reduced mice. Furthermore, 50 hits include both H and L ferritin as being  
24 significantly increased in aggregates from aged mice on a standard diet (Fig. 3D), and we now detected  
25 “ferric iron-binding” as an overrepresented characteristic within this group (Fig. 3E). Taken together,  
26 our data suggest that the splenic heme- and iron-rich deposits are composed of a wide spectrum of  
27 aggregation-prone protein debris that likely emerges from damaged RPMs.

28 To further explore links between splenic iron deposition and RPMs’ functions, we monitored in a time-  
29 wise manner how the formation of iron-rich aggregates corresponds to the iron-recycling performance  
30 of RPMs. We found that RPMs reduce their EP and lysosomal degradation capacity early during age  
31 progression (Fig. 3F and G). Correspondingly to the EP drop in mice at 5 months of age, we observed  
32 that at the same time point splenic RBCs exhibit the senescence marker, increased ROS levels (Fig. 3H).  
33 Interestingly, these changes reflect the kinetics of splenic non-heme iron loading (Fig. 3I). Likewise, we  
34 observed that the extracellular splenic protein deposits appear in 5-months-old mice, and their  
35 abundance increases during aging (Fig. 3J). Since these deposits are insoluble, we propose that their  
36 formation limits the bioavailability of iron for further systemic utilization. In support of this possibility,  
37 we noticed that the drop in transferrin saturation during aging coincides with RPMs’ failure and the

- 1 appearance of splenic aggregates (Fig. 3K). In sum, our data support the model that defects in the iron-
- 2 recycling capacity of RPMs, along with their damage, drive iron retention in the spleen in the form of
- 3 non-bioavailable protein-rich deposits.

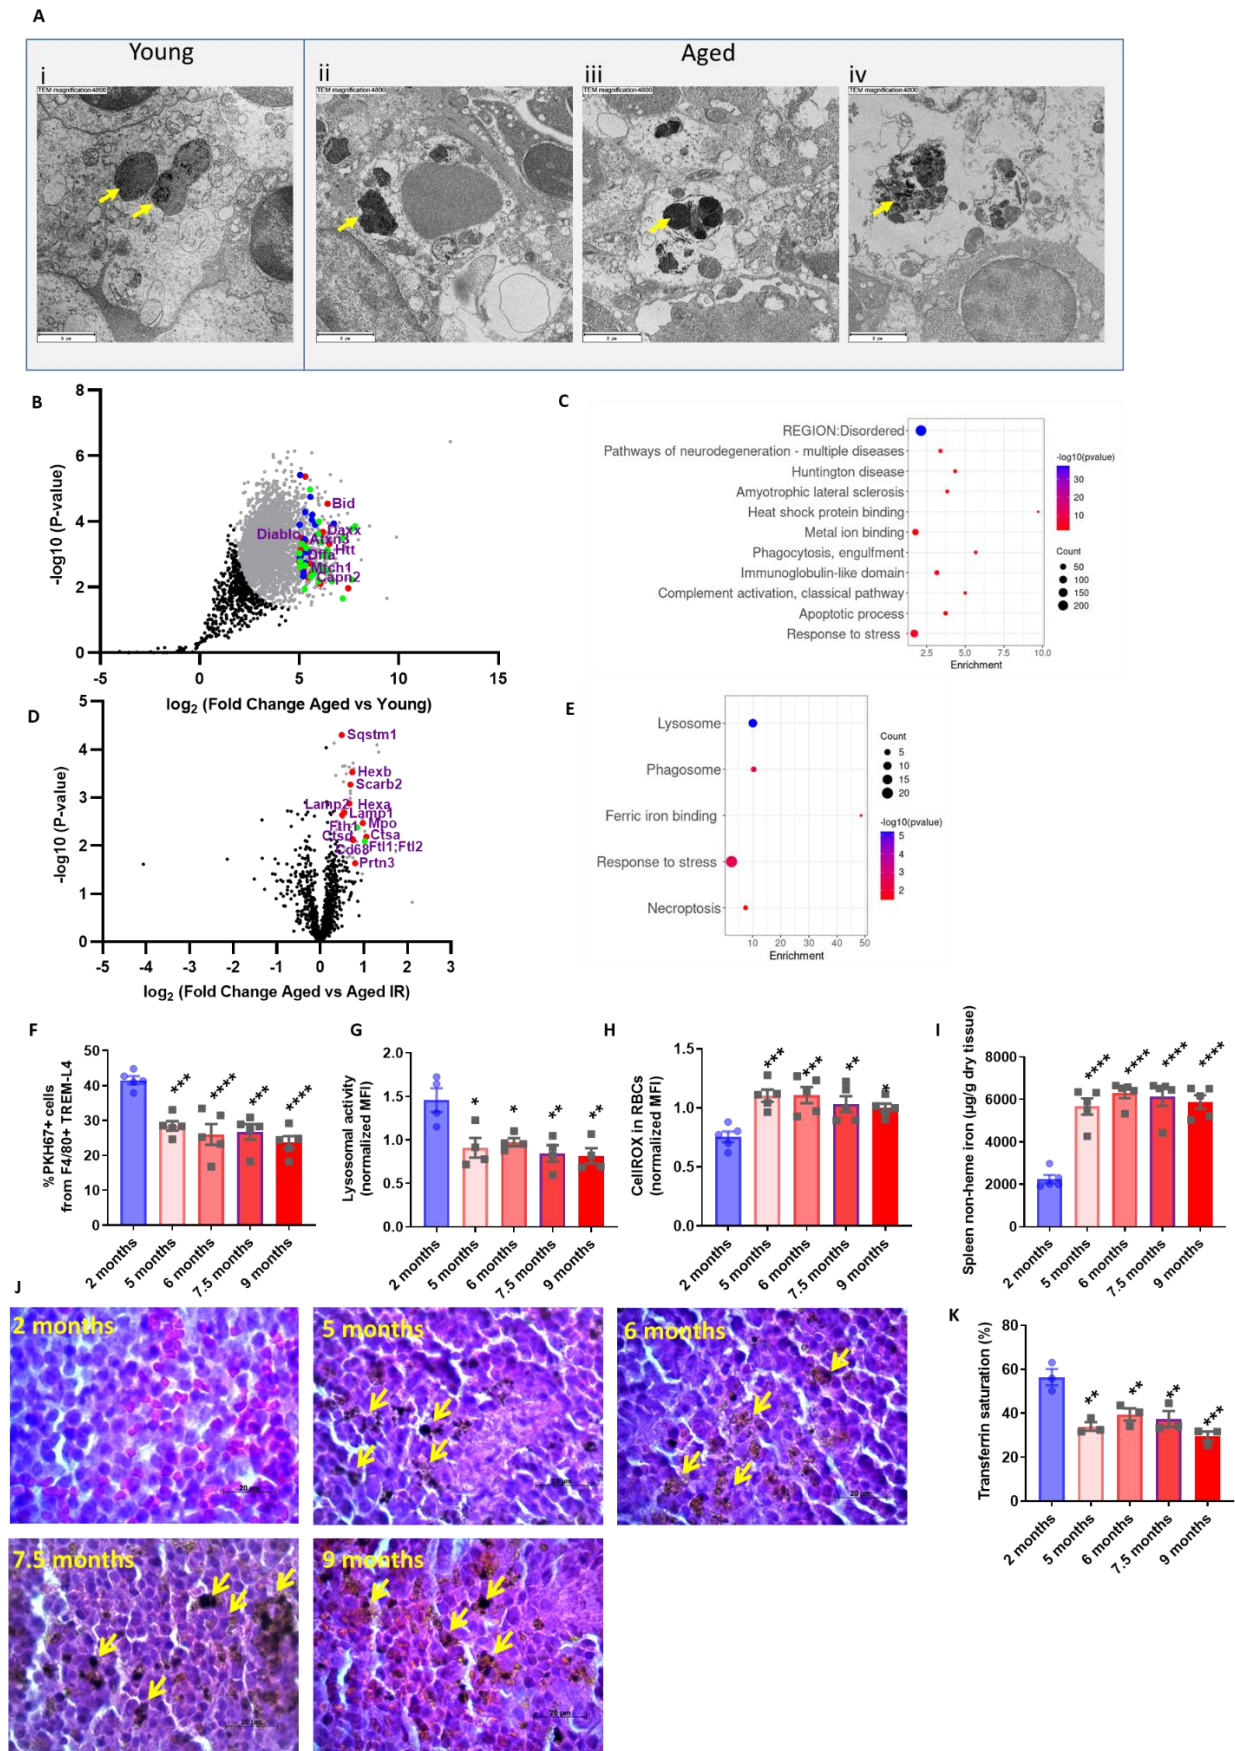

1  
2  
3  
4

**Figure 3. Splenic age-triggered iron deposits are rich in aggregation-prone protein debris that likely emerges from dysfunctional and damaged RPMs**

- 1 (A) Ultrastructural analyses of the spleen red pulp sections by transmission electron microscopy. Arrows indicate dark-colored  
2 dense deposits.  
3 (B) Volcano plot illustrating 3290 protein groups (in grey) that are significantly more abundant in magnetically-sorted, cell-  
4 free aggregates derived from aged *versus* young spleen. Based on the functional enrichment analyses, the red color denotes  
5 proteins linked with “pathways of neurodegeneration”, green - those associated with an “apoptotic process” and blue - those  
6 related to the “immunoglobulin-like domain” category.  
7 (C) Enriched functional categories among top 387 protein hits that are more abundant in magnetically-sorted, cell-free  
8 aggregates derived from aged *versus* young spleen.  
9 (D) Volcano plot illustrates protein groups (in grey) that are significantly more abundant in magnetically-sorted, cell-free  
10 aggregates derived from aged *versus* aged IR spleen. Based on the functional enrichment analyses, the red color denotes  
11 proteins linked with “lysosome” and green – H and L ferritin.  
12 (E) Enriched functional categories among 50 protein hits that are more abundant in magnetically-sorted, cell-free aggregates  
13 derived from aged *versus* aged IR spleen.  
14 (F) RBC clearance capacity of RPMs in mice at the indicated age was determined by measuring the percentage of RPMs that  
15 phagocytosed transfused PKH67-labeled temperature-stressed RBCs.  
16 (G) The lysosomal activity of RPMs derived from mice at the indicated age was determined using a dedicated fluorescent  
17 probe and flow cytometry.  
18 (H) The cytosolic ROS levels in RPMs derived from mice at the indicated age were assessed by determining CellROX Deep Red  
19 fluorescence intensity with flow cytometry.  
20 (I) Spleen non-heme iron content was determined in mice at the indicated age.  
21 (J) Hematoxylin/eosin staining of the splenic red pulp in young, aged, and aged IR mice. Arrows indicate extracellular brown  
22 protein aggregates.  
23 (K) Plasma transferrin saturation was determined in mice at the indicated age.  
24  
25 Each dot represents one mouse. Data are represented as mean  $\pm$  SEM. Statistical significance among the three or more groups  
26 was determined by One-Way ANOVA test with Tukey’s or Dunnett’s Multiple Comparison test. \* $p < 0.05$ , \*\* $p < 0.01$ ,  
27 \*\*\* $p < 0.001$  and \*\*\*\* $p < 0.0001$   
28

## 29 **Iron-recycling dysfunction during aging involves RPM ferroptosis**

30 Increased iron burden in RPMs was shown previously to drive ferroptotic cell death upon acute  
31 transfusion of damaged RBCs (Youssef et al., 2018). Since the TEM imaging revealed damaged iron-  
32 loaded RPMs in aged spleens, we speculated that RPMs may undergo spontaneous ferroptosis during  
33 aging. In agreement with this hypothesis, both labile iron, a factor that promotes ferroptosis, and lipid  
34 peroxidation, a ferroptosis marker (Dixon et al., 2012; Friedmann Angeli et al., 2014) increase in RPMs  
35 during aging following a similar pattern as their functional impairment and the formation of iron-rich  
36 splenic protein aggregates (Fig. 4A and B). Importantly, we observed that feeding mice an IR diet during  
37 aging diminishes lipid peroxidation to the levels characteristic of young mice (Fig. 4C), similarly to  
38 what we observed for the LIP build-up (Fig. 1G). In agreement with the TEM data, we also detected a  
39 lower representation of RPMs in spleens of aged mice, a phenotype that likewise was alleviated by  
40 limited dietary iron content (Fig. 4D). Earlier studies reported that ferroptotic cells are characterized by  
41 reduced mitochondria size but not mitochondrial oxidative stress (Chen et al., 2021; Dixon et al., 2012;  
42 Friedmann Angeli et al., 2014). Others demonstrated that cells that undergo ferroptosis exhibit  
43 diminished mitochondrial membrane potential and a drop in cellular ATP levels (Neitemeier et al.,  
44 2017). Consistent with these data, we failed to detect augmented ROS levels in mitochondria of aged  
45 RPMs (Fig. 4E). Instead, we observed that mitochondria mass (measured with the MitoTracker probe,  
46 Fig. 4F) as well as mitochondrial activity (determined by the TMRE probe that quantifies mitochondrial  
47 membrane potential, Fig. 4G) decrease in RPMs of aged mice, and both these phenotypes are alleviated  
48 by an IR diet. This corresponds to higher ATP levels in FACS-sorted RPMs derived from aged mice fed

1 an IR diet compared to the standard diet (Fig. 4H). Previous ultrastructural studies showed that  
 2 mitochondria of ferroptotic cells are hallmarked with a reduced size and fewer cristae, increased  
 3 membrane density, and some appear swollen (Chen et al., 2021; Dixon et al., 2012; Friedmann Angeli  
 4 et al., 2014). Consistently, our TEM imaging showed that in contrast to the RPMs of young mice, those  
 5 from aged animals exhibit the above mitochondrial defects and some seem disintegrated (Fig. 4I).  
 6 Mitochondria from mice fed an IR diet were small and dense, but they display a lesser degree of swelling  
 7 and damage. Taken together, our data suggest that aging is hallmarked by both impaired iron-recycling  
 8 functions of RPMs and their depletion likely via ferroptosis, both defects that we found alleviated by  
 9 the reduction of dietary iron content.

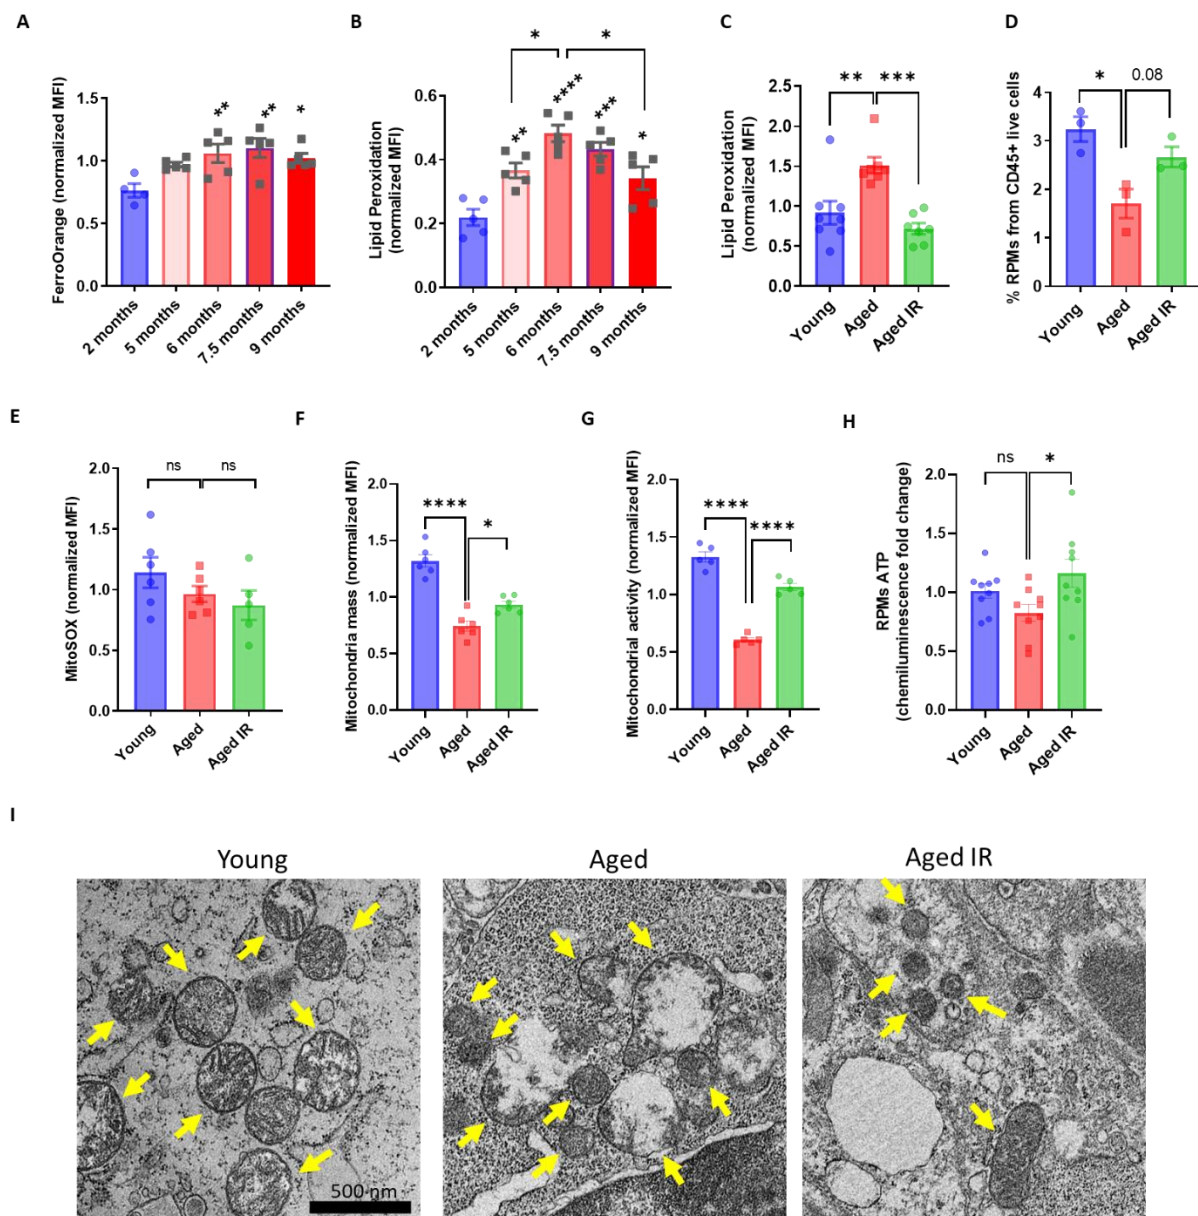

10  
 11  
 12  
 13  
 14  
 15

**Figure 4. Iron-recycling dysfunction during aging involves RPM ferroptosis.**

(A) Cytosolic ferrous iron (Fe<sup>2+</sup>) content in RPMs isolated from mice at the indicated age was measured using FerroOrange and flow cytometry.



- 1 (B) Lipid peroxidation was determined in RPMs derived from mice at the indicated age using a dedicated ratiometric  
2 fluorescent probe and flow cytometry.  
3 (C) Lipid peroxidation was determined in RPMs derived from young, aged, and aged IR mice using a dedicated ratiometric  
4 fluorescent probe and flow cytometry.  
5 (D) Shown is the percentage of RPMs from CD45+ live cells present in the spleen of young, aged, and aged IR mice.  
6 (E) Mitochondrial ROS levels in RPMs derived from young, aged, and aged IR mice were determined using the MitoSOX probe  
7 and flow cytometry.  
8 (F) The mitochondrial mass and (G) mitochondrial membrane potential in RPMs isolated from young, aged, and aged IR mice  
9 were measured by staining with MitoTracker Green and TMRE, respectively, and analyzed by flow cytometry.  
10 (H) Levels of ATP in FACS-sorted RPMs isolated from young, aged, and aged IR.  
11 (I) Ultrastructural analyses of mitochondrial morphology in spleen red pulp sections obtained from young, aged, and aged IR  
12 mice. Yellow arrows indicate mitochondria.

13  
14 Each dot represents one mouse. Data are represented as mean  $\pm$  SEM. Statistical significance among the three or more groups  
15 was determined by One-Way ANOVA test with Tukey's or Dunnett's Multiple Comparison test. \* $p < 0.05$ , \*\* $p < 0.01$ ,  
16 \*\*\* $p < 0.001$  and \*\*\*\* $p < 0.0001$

### 17 18 **Iron loading, but not oxidative stress or diminished mitochondrial function of RPMs suppresses** 19 **the iron-recycling capacity**

20 The contribution of iron deposition to age-related deterioration of cellular functions is believed to be  
21 primarily mediated by the pro-oxidative properties of labile iron (Xu et al., 2008). We observed a clear  
22 indication of oxidative stress in aging RPMs (Fig. 1I) that was rescued by the IR diet. Next, we aimed  
23 to verify whether the increased ROS levels solely contribute to diminished phagocytic and cellular  
24 functions of RPMs during aging. To this end, we supplemented aging mice with antioxidant N-Acetyl-  
25 L-cysteine (NAC), which was previously shown to revert aging-related physiological changes (Berman  
26 et al., 2011; Ma et al., 2016). With this strategy, we successfully reduced oxidative stress in aged RPMs  
27 (Fig. 5A). However, we did not observe an improvement in the reduced rate of EP in RPMs isolated  
28 from NAC-supplemented mice compared to control aged mice (Fig. 5B). Likewise, the retention of  
29 senescent RBCs in the spleen (Fig. 5C), their local hemolysis (Fig. 5D), as well as the splenic iron  
30 loading (Fig. 5E), and the formation of the insoluble aggregates (Fig. 5F) were not rescued by the NAC  
31 administration. Lastly, the ferroptosis marker, lipid peroxidation was equally elevated in RPMs of aged  
32 mice regardless of the NAC treatment (Fig. 5G). These data suggest that the ability of RPMs to remove  
33 RBCs, and consequently iron and erythrocyte homeostasis in the spleen are likely affected directly by  
34 RPM iron loading rather than excessive ROS. To follow this possibility, we next employed a cellular  
35 model of bone marrow-derived macrophages, exposed to hemin and IL-33, two factors that drive RPMs  
36 differentiation (Haldar et al., 2014; Lu et al., 2020) and induce RPM-like transcriptional signatures (Lu  
37 et al., 2020). We noted that these cells that we termed "induced RPMs" (iRPMs) significantly decrease  
38 their EP activity upon iron overload with ferric ammonium citrate (FAC) in a manner that is partially  
39 rescued by the iron chelator DFO (Fig. 5H). Interestingly, adding the same dose of hemin as FAC did  
40 not significantly alter the rate of RBCs uptake by iRPMs, suggesting a low sensitivity of the phagocytic  
41 system of these cells to excessive heme. Furthermore, we observed that iron loading by FAC, but not  
42 hemin, suppresses lysosomal activity (Fig. 5I). We also found that mitochondria membrane potential  
43 was similarly diminished by FAC, hemin, and DFO alone, thus uncoupling the phagocytic and

1 lysosomal activity of iRPMs from their mitochondria fitness (Fig. 5J). In sum, our data indicate a  
 2 causative link between iron loading, a condition that reflects the physiological status of aging mouse  
 3 RPMs, and the perturbation of the iron-recycling capacity of RPM-like cells.

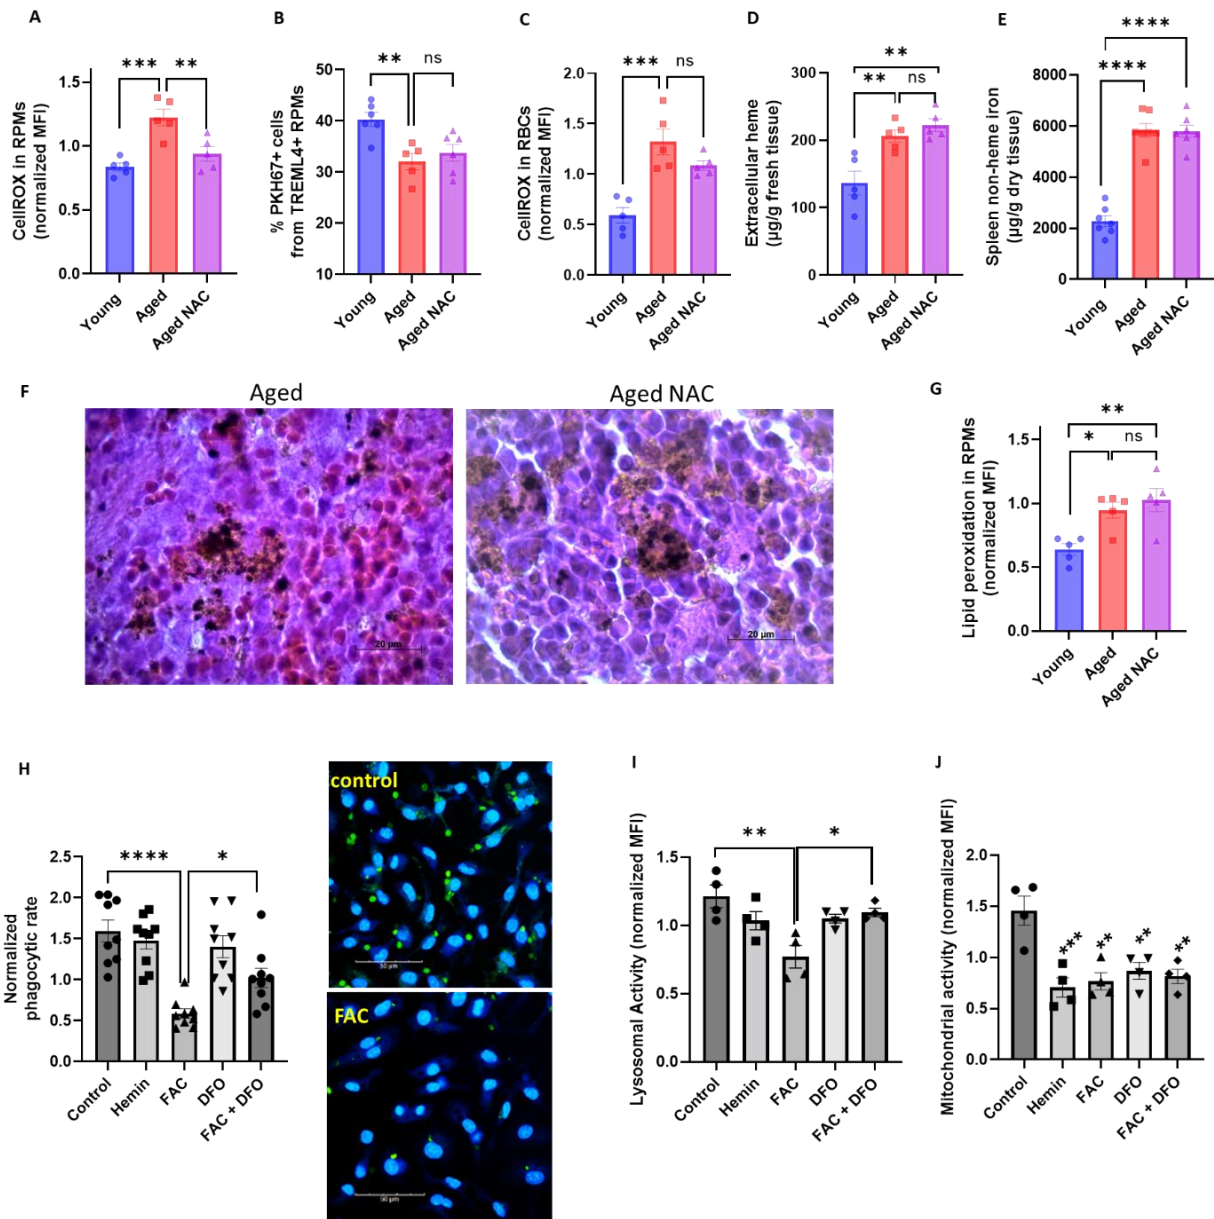

4  
 5  
 6 **Figure 5. Iron loading, but not oxidative stress or diminished mitochondrial function of RPMs suppresses the**  
 7 **iron-recycling capacity.**

8 (A) The cytosolic ROS levels in RPMs derived from young, aged, and aged NAC were assessed by determining CellROX Deep  
 9 Red fluorescence intensity with flow cytometry.

10 (B) RBC clearance capacity of RPMs derived from young, aged, and aged NAC mice was determined by measuring the  
 11 percentage of RPMs that phagocytosed transfused PKH67-labeled temperature-stressed RBCs.

12 (C) The cytosolic ROS levels in RBCs derived from the spleen of young, aged, and aged NAC mice were assessed by determining  
 13 CellROX Deep Red fluorescence intensity with flow cytometry.

14 (D) Extracellular heme levels were measured in the medium obtained after dissociation of spleens from young, aged, and  
 15 aged NAC mice using Heme Assay Kit.

16 (E) Spleen non-heme iron content was determined in young, aged, and aged NAC mice.

17 (F) Hematoxylin and eosin staining of the splenic red pulp in young, aged, and aged IR mice.

18 (G) Lipid peroxidation was determined in RPMs derived from young, aged, and aged NAC mice using a dedicated ratiometric  
 19 fluorescent probe and flow cytometry.

1 (H) Normalized phagocytic rate of PKH67-labeled temperature-stressed RBCs by cultured iRPMs. Cells were treated with FAC  
2 (50  $\mu$ M, 24 h), hemin (50  $\mu$ M, 24 h), or DFO (100  $\mu$ M, 18 h) as indicated. Representative confocal microscopic images of  
3 erythrophagocytosis in FAC-treated iRPMs compared with control cells are shown on the right.

4 (I) Lysosomal and (J) mitochondrial activity of cultured iRPMs were determined using dedicated fluorescent probes and flow  
5 cytometry. Cells were treated with FAC (50  $\mu$ M, 24 h), hemin (50  $\mu$ M, 24 h), or DFO (100  $\mu$ M, 18 h) as indicated.

6  
7 Each dot represents one mouse or independent cell-based experiment. Data are represented as mean  $\pm$  SEM. Statistical  
8 significance among the three or more groups was determined by One-Way ANOVA test with Tukey's Multiple Comparison  
9 test. \* $p$ <=0.05, \*\* $p$ <=0.01, \*\*\* $p$ <=0.001 and \*\*\*\* $p$ <=0.0001

## 11 **Iron loading undermines the phagocytic activity of aged RPMs in concert with impaired heme** 12 **metabolism and ER stress**

13 Our data so far imply that iron accumulation in RPMs suppresses their iron-recycling functions.  
14 However, restoration of iron status in RPMs of aging mice by IR diet does not fully recover EP activity  
15 (Fig. 1J). To further understand the molecular mechanisms that influence phagocytic RPMs dysfunction  
16 during aging, we performed RNA sequencing of FACS-sorted RPMs from young and aged mice. We  
17 identified 570 differentially expressed genes, including 392 up- and 178 down-regulated transcripts (Fig.  
18 S7A). Interestingly, only 54 genes were found differentially regulated between mice fed a standard and  
19 IR diet (Fig. S7B), implying that functional changes between these groups are largely based on protein  
20 levels, activity and/or post-transcriptional changes. Functional enrichment analysis revealed that aged  
21 RPMs, regardless of the dietary regimen, are hallmarked by ER stress, unfolded protein response, and  
22 ER-associated degradation (ERAD) (Fig. 6A and S7C). This observation corroborates the finding that  
23 extracellular iron-rich protein aggregates, which appear, albeit to a lesser extent, in IR mice, are enriched  
24 in proteins that imply proteotoxic stress in aged RPMs (Fig. 3C). ERAD is a pathway for targeting  
25 misfolded ER proteins for cytoplasmic proteasomal degradation (Qi et al., 2017). Correspondingly, we  
26 identified a significant increase in proteasomal activity in aged RPMs, measured with a dedicated  
27 fluorescent probe that undergoes proteasomal cleavage (Fig. 6B). The IR diet rescued this phenomenon,  
28 suggesting links with iron/oxidative stress-related factors and potentially a compensatory response to  
29 the lysosomal-mediated proteostatic control (Fig. 1K). Furthermore, our RNA-seq data revealed that  
30 one of the transcripts that significantly decrease in aged RPMs independent of diet is *Hmox-1*, which  
31 encodes HO-1. We validated this result using intracellular staining and flow cytometry, and uncovered  
32 a marked decrease in HO-1 protein level in aged RPMs (Fig. 6C). Interestingly, this HO-1 drop seems  
33 to progress between 5 to 9 months of age (Fig. 6D), thus reflecting both diminished EP rate and  
34 lysosomal activity (Fig. 3F and G). Correspondingly, the blockage of HO-1 in iRPMs with zinc  
35 protoporphyrin (ZnPP) suppressed the EP rate (Fig. 6E) and, to a lesser extent, the capacity for  
36 lysosomal degradation (Fig. 6F). RPMs derived from aging mice show similar HO-1 levels and the  
37 degree of ER stress irrespective of diet and differ primarily in iron status (Fig. 1G and H). Therefore,  
38 we next tested how the combination of a relatively low dose of ZnPP (0.5  $\mu$ M) and the ER stress inducer  
39 tunicamycin with a mild FAC exposure (10  $\mu$ M) affects EP *in cellulo*. Whereas ER stress alone did not  
40 significantly affect EP, we uncovered that FAC treatment elicited an additive effect with combined

1 exposure to ZnPP and tunicamycin, but not with ZnPP alone (Fig. 6G). Finally, we explored why ZnPP,  
2 but not hemin alone, suppresses EP. We speculated that possibly another co-product of HO-1 enzymatic  
3 activity, such as CO or biliverdin (Gozzelino et al., 2010), counterbalances the suppressive effect of iron  
4 release after EP. Thus, we tested whether the effect of ZnPP on EP can be rescued by supplementation  
5 of cells with CO donor CORMA1 or biliverdin. Interestingly, we found that CORMA1, but not  
6 biliverdin, rescues EP rate under ZnPP exposure in iRPMs (Fig. 6H and I), implying that CO acts as a  
7 modulator of EP activity in RPMs. Collectively, our data imply that iron retention in RPMs suppresses  
8 EP in synergy with ER stress, HO-1 loss, and possibly CO deficiency, but likely represent the key factor  
9 that determines their RBC clearance potential.

10

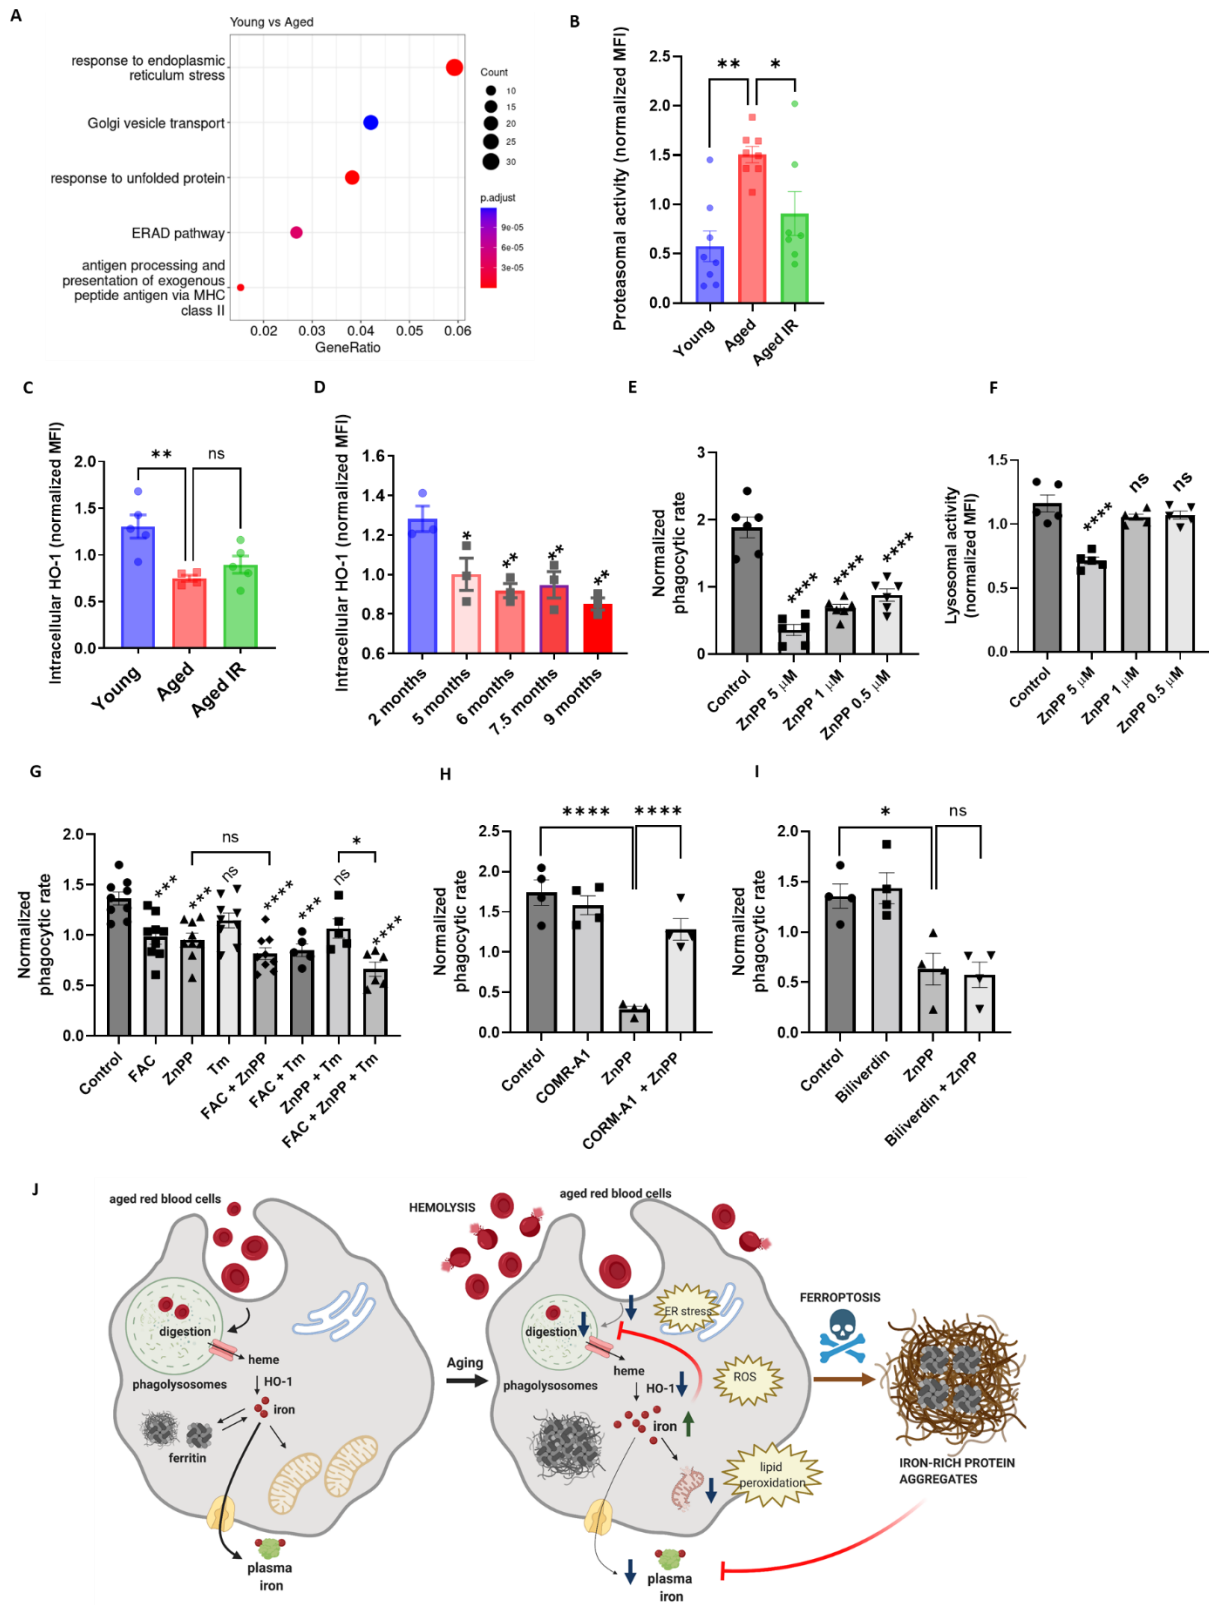

1  
2  
3  
4  
5  
6  
7  
8  
9

**Figure 6. Iron loading undermines the phagocytic activity of aged RPMs in concert with impaired heme metabolism and ER stress.**

(A) Enriched functional categories among differentially regulated genes in FACS-sorted RPMs derived from young *versus* aged mice (identified by RNA-seq).

(B) Proteasomal activity measured in RPMs isolated from young, aged, and aged IR mice using a dedicated fluorescent probe and flow cytometry.

(C) Intracellular HO-1 protein levels in RPMs isolated from young, aged, and aged IR mice.

- 1 (D) Intracellular HO-1 protein levels in RPMs isolated from mice at the indicated age.  
2 (E) Normalized phagocytic rate of PKH67-labeled temperature-stressed RBCs and (F) normalized lysosomal activity by cultured  
3 iRPMs. Cells were treated with indicated concentrations of the HO-1 inhibitor ZnPP for 24 h.  
4 (G) Normalized phagocytic rate of PKH67-labeled temperature-stressed RBCs by cultured iRPMs. Cells were treated with  
5 indicated low concentrations of ZnPP (0.5  $\mu$ M) and FAC (10  $\mu$ M) and with ER stress inducer Tunicamycin (Tm; 2.5  $\mu$ M) for 24  
6 h.  
7 (H and I) Normalized phagocytic rate of PKH67-labeled temperature-stressed RBCs by cultured iRPMs. Cells were treated with  
8 ZnPP (5  $\mu$ M) and (H) CORMA1 (50  $\mu$ M) or (I) Biliverdin (50  $\mu$ M).  
9 (J) The proposed model of aging-triggered impairment of the iron-recycling functions of RPMs.

10  
11 Each dot represents one mouse or independent cell-based experiment. Data are represented as mean  $\pm$  SEM. Statistical  
12 significance among the three or more groups was determined by One-Way ANOVA test with Dunnett's or Tukey's Multiple  
13 Comparison test. \* $p < 0.05$ , \*\* $p < 0.01$ , \*\*\* $p < 0.001$  and \*\*\*\* $p < 0.0001$

14

## 15 Discussion

16 RPMs play an essential role in preventing the release of hemoglobin from RBCs and maintaining the  
17 internal recycling of the body iron pool (Slusarczyk and Mleczko-Sanecka, 2021). To date, impairments  
18 of their functions have been reported in genetically modified mice, including models with an almost  
19 complete or partial loss of RPMs due to the absence of genes that control RPMs differentiation, such as  
20 *Pparg*, *Spi-c*, *Il-33*, or its receptor *Il1rl1* (Kohyama et al., 2009; Lu et al., 2020; Okreglicka et al., 2021).  
21 Here, for the first time, we provide evidence that the defective RPMs' capacity for RBC clearance and  
22 degradation together with ferroptotic RPMs depletion accompanies physiological aging, promoting local  
23 RBC dyshomeostasis and the formation of protein-rich extracellular iron aggregates in the spleen (Fig.  
24 6J). We demonstrate that these phenomena can be mitigated by reducing dietary iron availability.

25 Since the unique architecture of the spleen confers a filter for verifying the biomechanical integrity of  
26 RBCs (Mebius and Kraal, 2005; Slusarczyk and Mleczko-Sanecka, 2021), we observed only local but  
27 not systemic dyshomeostasis of RBCs during aging. Most importantly, we found that splenic RBCs of  
28 aged mice show ROS accumulation, a characteristic feature of senescent RBCs, and a risk factor for  
29 enhanced hemolysis (Zhang et al., 2018). Recent insights suggest that iron recycling in the spleen is  
30 driven by an equilibrium between phagocytosis and natural hemolysis of RBCs (Klei et al., 2020). Our  
31 study implies that this balance is likely shifted towards the extracellular destruction of senescent RBCs  
32 in aging. It remains to be investigated whether the exposure of the splenic microenvironment to  
33 excessive heme due to the enhanced breakdown of RBCs may affect the function of other cells that  
34 traffic and reside in the spleen, such as lymphocytes.

35 The present study provides, what we believe, is new evidence for the origin and nature of iron deposits  
36 in the aging spleen that also hallmark genetic mouse model of impaired iron-recycling (Kohyama et al.,  
37 2009; Lu et al., 2020; Okreglicka et al., 2021). We found that they are rich in iron and heme, suggesting  
38 that they may still be derived, likely not directly, from erythrocytes and contain many proteins (>3000)  
39 of different subcellular origins. Since the aggregates are enriched in proteins related to phagocytic  
40 removal of antibody and complement opsonized cargos and in lysosomal components, they may be a  
41 reminiscence of phagocytic and lytic events of RPMs. However, our observations imply that two driving  
42 forces underlie the formation of these deposits: proteostasis defects and RPMs damage.

1 The longevity of RPMs (Hashimoto et al., 2013; Liu et al., 2019) puts pressure on the cell to handle the  
2 constant flux of iron, a factor that increases protein insolubility (Klang et al., 2014), and RBC-derived  
3 proteins. These may increase the risk for the build-up of proteotoxic elements in RPMs. Consistently,  
4 we found a clear transcriptional signature for ER stress and unfolded protein response in aged RPMs.  
5 Interestingly, it was also reported that phagocytosis triggers ER stress in macrophages (Kim et al., 2018),  
6 providing another explanation of how ER homeostasis may be affected in constitutive phagocytes such  
7 as RPMs. The aggregates that emerge in the aging spleen are chiefly composed of aggregation-prone  
8 proteins that contain disordered regions and are associated with different pathways of  
9 neurodegeneration. It has been reported previously that excessive iron in the brain promotes the  
10 progression of neurodegenerative disorders, such as Alzheimer's disease (Liu et al., 2018; Raven et al.,  
11 2013). Interestingly, iron deposits were shown to spatially colocalize with  $\beta$ -amyloid plaques  
12 (Ndayisaba et al., 2019; van Bergen et al., 2016). Our findings provide a new link between splenic and  
13 brain protein aggregation that is known to underlie cognitive impairment. Future studies would be  
14 required to investigate how these protein deposits may affect other (e.g. immune) functions in the spleen.  
15 Moreover, our work suggests that in addition to various iron chelation approaches (Liu et al., 2018),  
16 long-term reduction of dietary iron intake may limit protein aggregation in the brain and thus represent  
17 an alternative for dementia prevention.

18 Second, our data imply that RPMs undergo spontaneous ferroptotic cell death, a response that thus far  
19 was mainly described in genetic models, e.g. with disturbed detoxification of lipid peroxides due to  
20 inducible or cell type-specific loss of *Gpx4* (Friedmann Angeli et al., 2014; Matsushita et al., 2015) or  
21 in various pathologies, such as ischemia-reperfusion injury, myocardial infarction or neurodegeneration  
22 (Park et al., 2019; Yan et al., 2021). In the latter context, iron-rich activated microglial cells were shown  
23 to localize to  $\beta$ -amyloid deposits and undergo cell death upon plaques phagocytosis (Baik et al., 2016;  
24 Kenkhuis et al., 2021). This may partially resemble the phenomenon that we observe in the aging spleen,  
25 opening a possibility that functional RPMs may attempt to phagocytose the extracellular protein  
26 deposits, which may lead to their damage. Notably, the excessive clearance of damaged RBCs in mouse  
27 models of blood transfusion, hemolytic anemia, or the anemia of inflammation induced by heat-killed  
28 *Brucella abortus* was previously shown to cause RPMs loss, likely via ferroptosis (Halder et al., 2014;  
29 Theurl et al., 2016; Youssef et al., 2018). Whereas the splenic niche may be replenished to some extent  
30 via monocyte recruitment and/or resident RPMs proliferation (Halder et al., 2014; Youssef et al., 2018)  
31 our data imply that RPM depletion may lead to the irreversible formation of insoluble iron-rich splenic  
32 protein aggregates, a possibility that would require further investigations. Premature clearance of  
33 defective RBCs also hallmarks  $\beta$ -thalassemia (Slusarczyk and Mleczko-Sanecka, 2021). To the best of  
34 our knowledge, RPM loss was not extensively studied in a mouse model of thalassemia. However,  
35 interestingly, thalassemic mice display enhanced splenic Perls'-stained deposits that appear extracellular  
36 and are not amenable to iron chelation therapy (Sanyal et al., 2020; Vadolas et al., 2021), possibly  
37 resembling those identified by the present study.

1 Of note, our findings that the aggregates are enriched in apoptosis-related proteins are not in conflict  
2 with the proposed involvement of ferroptotic cell death. One of such proteins, for example, is BID, an  
3 apoptosis agonist that mediates mitochondrial defects in ferroptotic neurons, and also was shown to be  
4 required for the execution of ferroptosis itself (Neitemeier et al., 2017). Moreover, several studies  
5 showed that the induction of ferroptosis in mice, for example in the context of acute renal injury, is  
6 hallmarked by DNA fragmentation detected by the TUNEL staining (Friedmann Angeli et al., 2014), a  
7 typical apoptosis marker.

8 Genetic disruption of *Hrg-1*, a transporter that delivers RBC-derived heme to the cytoplasm, leads to  
9 the formation of heme aggregate hemozoin inside enlarged phagolysosomes of RPMs (Pek et al., 2019).  
10 The large size, extracellular localization, and high content of proteins distinguish age-triggered splenic  
11 aggregates from hemozoin. However, we cannot exclude the possibility that this polymer-like structure  
12 may expand during aging and contribute to the formation of splenic protein-rich iron deposits.

13 Erythrocyte removal by iron recycling macrophages is considered an essentially constitutive process.  
14 Nevertheless, recent advances revealed that it remains under the control of calcium signaling and can be  
15 modulated by inflammatory signals (Bennett et al., 2019; Ma et al., 2021). Interestingly, it was unknown  
16 if the RBCs uptake rates are regulated by iron availability *per se*. Our study identified three factors that  
17 affect the intensity of EP, the iron content, the activity of HO-1, and, to less extent, ER stress. Among  
18 them, labile and total iron accumulation in RPMs, independently of ROS generation, emerged as a major  
19 driver of EP suppression during aging. We also demonstrated that iron loading decreases the lysosomal  
20 activity of iRPMs and that lysosomal activity in RPMs *in vivo* closely reflects their iron status.

21 Consistently, excessive iron was shown by others to promote ROS-triggered lysosomal membrane  
22 permeabilization (Kurz et al., 2011) and to inhibit phagosome fusion with lysosomes (Kelley and  
23 Schorey, 2003). Our data assign physiological context to this previous knowledge, as RPMs  
24 constitutively rely on lysosomal activity to exert their functions. The underlying mechanisms for  
25 excessive iron deposition in aged RPMs likely include reduced FPN protein levels and deficient  
26 functional H ferritin that detoxifies redox-active ferrous iron (Mieczko-Sanecka and Silvestri, 2021). It  
27 is also plausible that, like neurons, aged RPMs may also show low capacity for heme synthesis (Atamna  
28 et al., 2002), which may lead to defective iron utilization in the mitochondria and increased cytoplasmic  
29 iron burden. Mitochondrial damage that we identified in aged RPMs may support this possibility.

30 Another medically relevant condition hallmarked by iron retention in RPMs is inflammation (Guida et  
31 al., 2015; Kim et al., 2014). It remains to be investigated whether under such settings iron accumulation  
32 contributes to the iron-recycling capacity and possibly RPMs loss. Given that the net outcome in young  
33 mice is EP stimulation (Bennett et al., 2019; Bian et al., 2016; Delaby et al., 2012), it is plausible that  
34 inflammatory signals override the suppressive effect of iron. Our study also suggests that aged mice  
35 characterized by defective RPMs may not potentiate EP rate in response to inflammation. Since this  
36 phenomenon was proposed to activate stress erythropoiesis (Bennett et al., 2019), age progression may  
37 impair this adaptive response and impede recovery from inflammation-triggered anemia.



1 The heme catabolizing enzyme HO-1 is well characterized for its cytoprotective, anti-oxidative, and  
2 anti-inflammatory function, mainly attributed to its products, CO and biliverdin (Gozzelino et al., 2010).  
3 More recently, HO-1 activity was proposed to prevent cellular senescence in endothelial cells,  
4 fibroblasts or macrophages, via decreasing ROS levels, improving mitochondria function, or protecting  
5 from DNA damage (Even et al., 2018; Hedblom et al., 2019; Luo et al., 2018; Suliman et al., 2017).  
6 Iron-recycling RPMs are key cells where HO-1 exerts its enzymatic function (Vijayan et al., 2018) and  
7 complete HO-1 deletion in mice leads to RPMs death due to heme-driven toxicity (Kovtunovych et al.,  
8 2010). Our observation that HO-1 levels decrease in these cells during aging is thus of high physiological  
9 significance. As aged RPMs show some hallmarks of senescence linked to HO-1 deficiency, such as  
10 defective mitochondria or excessive ROS, they do not exhibit proinflammatory gene expression  
11 signatures. Instead, our RNA-seq data reveal rather an anti-inflammatory transcriptional pattern,  
12 exemplified by the downregulation of genes encoding for MHC class II complexes and the induction of  
13 *Il-10*. Future research may address if such skewing of aged RPMs may contribute to immunosenescence  
14 that accompanies aging (Nikolich-Zugich, 2018). Interestingly, the expansion of iron-recycling KCs that  
15 we observed in aged mice may exert further immunosuppressive functions, as shown previously for the  
16 liver macrophages exposed to erythrolytic stress (Olonisakin et al., 2020; Pfefferle et al., 2020).  
17 The observation that HO-1 inhibition suppresses EP in RPM-like cells may be underlain by the  
18 inhibitory effect of heme overload on general phagocytosis in macrophages (Martins et al., 2016).  
19 However, unlike standard BMDMs (data not shown), heme-supplemented iRPMs failed to modulate EP  
20 in response to exposure to excessive hemin, implying efficient heme catabolism via HO-1 in this model.  
21 We further provide evidence that another product of HO-1, CO, restores the EP capacity of cells  
22 subjected to HO-1 suppression, thus emerging as an inducer of RBCs uptake. These findings are in  
23 agreement with the previous work, reporting that CO administration protects HO-1 knock-out mice from  
24 sepsis-induced lethality via stimulation of bacterial phagocytosis (Chung et al., 2008). Whether deficient  
25 CO levels in RPMs *in vivo* contribute to EP suppression requires further investigation. Nevertheless, in  
26 support of this possibility, our RNA-seq data show that enzymes involved in the pentose phosphate  
27 pathway, such *Tkt*, *Taldo* or *G6pd*, transcriptional targets of CO-mediated regulation (Bories et al.,  
28 2020), seem downregulated in aged RPMs.

29 Collectively, our work demonstrates that age-triggered and iron-dependent functional defects of RPMs,  
30 specialized cells that supply iron to the organism, emerge during early aging and disrupt internal iron  
31 turnover (Fig. 6J). We propose that the build-up of un-degradable iron and protein-rich particles, in  
32 concert with increased hepcidin levels, limits plasma iron availability during aging. Future studies may  
33 be needed to design strategies for complete “rejuvenation” of the RPMs’ phagocytic activity or  
34 proteostatic homeostasis, to completely alleviate the excessive splenic hemolysis, the formation of iron-  
35 rich aggregates, and hence possibly fully restore plasma iron availability.

36

## 1 **Materials and Methods**

### 2 **Mice**

3 Female C57BL/6J mice were used for all the experiments and were maintained in specific pathogen-  
4 free conditions at the Experimental Medicine Centre (Bialystok, Poland). Starting with the age of 4  
5 weeks mice were fed a diet with a standard iron content (200 mg/kg, SAFE #U8958v0177; for Young  
6 and Aged), as described before (Kautz et al., 2008; Pagani et al., 2011) or reduced iron content [25  
7 mg/kg; SAFE #U8958v0294; for Aged iron reduced (IR)]. Diets were from SAFE (Augy, France). Mice  
8 were analyzed at 8-10 weeks (Young) and 10-11 months (Aged and Aged IR) of age. For  
9 supplementation with N-Acetyl-L-cysteine (NAC), aging mice (Aged NAC) were supplied with NAC  
10 dissolved in drinking water (2 g/L) from 8 weeks of age until 10-11 months of age. Mice were delivered  
11 to the local facility at the IIMCB and sacrificed after short acclimatization, or subjected to additional  
12 procedures, if applicable. All procedures were approved by the local ethical communities in Olsztyn and  
13 Warsaw (II LKE) (decisions: WAW2/015/2019; WAW2/149/2019; WAW2/026/2020;  
14 WAW2/149/2020).

### 15 **Preparation of single-cell suspension from mouse organs**

16 **Bone marrow** cells were harvested by flushing the femur and tibia using a 25G needle and sterile HBSS  
17 medium (Gibco, 14025092). Cells were centrifuged at 600g for 10 min at 4°C. **The spleen** was excised  
18 and mashed through a 70µm strainer (pluriSelect, 43-50070-51). For FACS and magnetic sorting, the  
19 spleen was additionally digested in HBSS medium containing 1 mg/ml Collagenase D (Roche,  
20 11088882001) and 50 U/ml DNase I for 30 min at 37°C. After that cells were washed with cold HBSS  
21 and centrifuged at 600g for 10 min at 4°C. **The liver** was extracted and perfused using Liver Perfusion  
22 Medium (Gibco, 17701038). Next, the organ was minced and digested in Liver Digest Medium (Gibco,  
23 17703034) for 30 min at 37°C. After that liver was pressed through a 70µm strainer in the presence of  
24 HBSS. Cells were centrifuged at 50g for 3 min and the pellet was discarded (hepatocytes). The  
25 supernatant was centrifuged at 700g for 15 min at 4°C. Pellet was resuspended in 5mL of PBS containing  
26 0,5% BSA and 5mL of 50% Percoll (Cytiva, 17-0891-01) diluted in PBS. The suspension was  
27 centrifuged at 700g for 30 min at 20°C. **Blood** was collected to a heparin-coated tube *via* heart puncture.  
28 Cells were washed with HBSS medium and centrifuged at 400g for 10 min at 4°C. For **peritoneal cells**  
29 isolation, peritoneal cavities were washed with HBSS medium, and the peritoneal fluid was aspirated  
30 and filtered through 70µm strainer, and cells were centrifuged at 600g for 5 min at 4°C.  
31 RBCs present in a single-cell suspension were lysed using 1X RBC Lysis buffer (BioLegend, 420302)  
32 for 3 min at 4°C. This step was omitted for analyses of erythroid cells and RBCs. Next, cells were  
33 washed with HBSS and centrifuged at 600g for 10 min at 4°C. Pellet was prepared for further functional  
34 assays and/or labeling with antibodies.

35

1

## 2 **Generation of iRPMs and treatments**

3 RPM-like cells (iRPMs) represent modified cultures of bone-marrow-derived macrophages.  
4 Mononuclear cells were obtained from femurs and tibias of female 2-4-months-old C57BL/6J mice.  
5 Sterile harvested cells were cultured at 37°C in 5% CO<sub>2</sub> at 0.5 X 10<sup>6</sup>/1mL concentration in RPMI-1640  
6 (Sigma-Aldrich, R2405) supplemented with 10% FBS (Cytiva, SV30160.03), 1X Penicillin-  
7 Streptomycin (Gibco, 15140122), and 20 ng/mL macrophage colony-stimulating factor (BioLegend,  
8 576406). On the 4<sup>th</sup> and 6<sup>th</sup> day medium was changed to fresh, supplemented with 20 µM of hemin  
9 (Sigma-Aldrich, 51280) and 10 ng/mL of IL-33 (BioLegend, 580506). Assays were performed on the  
10 8<sup>th</sup> day.

11 For treatments, ferric ammonium citrate (FAC, Sigma-Aldrich, F5879), CORM-A1 (Sigma-Aldrich,  
12 SML0315), and deferoxamine (Sigma-Aldrich, D9533) were diluted in sterile ddH<sub>2</sub>O. Zinc (II)  
13 Protoporphyrin IX (Sigma-Aldrich, 691550) and tunicamycin (Sigma-Aldrich, T7765) were diluted in  
14 anhydrous DMSO. Hemin (Sigma-Aldrich, 51280) solution was prepared with 0.15M NaCl containing  
15 10% NH<sub>4</sub>OH. All reagents after dilution were filtered through a 0,22µm filter and stored in -20°C except  
16 ferric ammonium citrate, which was always freshly prepared. Concentrations and time of treatments are  
17 indicated in the descriptions of the figures.

## 18 **Flow cytometric analysis and cell sorting**

19 Cell suspensions of spleens and livers and iRPMs (~ 1 × 10<sup>7</sup>) were stained with LIVE/DEAD Fixable  
20 Aqua/Violet (Invitrogen, L34966/L34964) as per the manufacturer's instructions to identify dead cells.  
21 After extensive washing, the cells were incubated with Fc block in a dilution of 1:100 in FACS buffer  
22 for 10 min at 4°C. Cells were then stained with fluorophore-conjugated antibodies, dilution of 1:100 to  
23 1:400, depending on the titration, in FACS buffer for 30 min at 4°C. Cells were washed thoroughly with  
24 FACS buffer and subjected to flow cytometry analysis. For analysis of splenic RPM populations, the  
25 following surface antibodies were used: CD45 (Biolegend, 30-F11), CD45R/B220 (Biolegend, RA3-  
26 6B2), F4/80 (Biolegend, BM8), CD11b (Biolegend, M1/70) and TREML4 (Biolegend, 16E5). TER-119  
27 (Biolegend) and CD71 (Biolegend, RI7217) were included for erythroid cell analysis. For analysis of  
28 liver Kupffer cell and iRPM populations, the following surface antibodies were used: CD45 (Biolegend,  
29 30-F11), F4/80 (Biolegend, BM8) and CD11b (Biolegend, M1/70). Detection of FPN was performed  
30 with a non-commercial antibody that recognizes the extracellular loop of mouse FPN [rat monoclonal,  
31 Amgen, clone 1C7 (Sangkhae et al., 2019); directly conjugated with Alexa Fluor 488 Labeling Kit  
32 (Abcam, ab236553)]. For analysis of RBCs, the following surface antibodies were used: CD45  
33 (Biolegend, 30-F11), TER-119 (Biolegend) and CD71 (Biolegend, RI7217). For analysis of peritoneal  
34 macrophages, the following surface antibodies were used: CD45 (Biolegend, 30-F11), F4/80  
35 (Biolegend, BM8), MHCII (Biolegend, M5/114.15.2) and CD11b (Biolegend, M1/70). Events were  
36 either acquired on Aria II (BD Biosciences) or CytoFLEX (Beckman Coulter) and were analyzed with

1 FlowJo or CytExpert, respectively. For RNA sequencing (RNA-seq) and ATP levels quantification,  
2 RPMs were sorted into Trizol-LS (Invitrogen, 10296010) or assay buffer, respectively, using an Aria II  
3 cell sorter (BD Biosciences) with an 85  $\mu\text{m}$  nozzle.

#### 4 **Functional Assays and detection of intracellular ferrous iron**

5 **Intracellular ROS** (APC channel) levels were determined by using CellROX Deep Red Reagent  
6 (Invitrogen, C10422) fluorescence according to the manufacturer's instructions. **Lipid peroxidation**  
7 (FITC vs PE channels) was determined with the Lipid Peroxidation Assay Kit (Abcam, ab243377)  
8 according to the manufacturer's instructions. **Mitochondria-associated ROS** (PE channel) levels were  
9 measured with MitoSOX Red (Invitrogen, M36008) at 2.5  $\mu\text{M}$  for 30 min at 37 °C. **Lysosomal activity**  
10 (FITC channel) was determined by using Lysosomal Intracellular Activity Assay Kit (Biovision, K448)  
11 according to the manufacturer's instructions. **Proteasomal activity** (FITC channel) was determined  
12 using Me4BodipyFL-Ahx3Leu3VS fluorescent proteasome activity probe (R&D Systems, I-190) at 2  
13  $\mu\text{M}$  for 1 hour at 37°C. **Mitochondria activity** (membrane potential, PE channel) was measured using  
14 a tetramethylrhodamine ethyl ester (TMRE) fluorescent probe (Sigma-Aldrich, 87917) at 400 nM for  
15 30 min at 37 °C. **Mitochondrial mass** (FITC/PE channel) was measured by fluorescence levels upon  
16 staining with MitoTracker Green (Invitrogen, M7514) at 100 nM for 30 min at 37 °C. The cells were  
17 subsequently stained with cell surface markers.

18 The content of **intracellular ferrous iron** (PE channel) ( $\text{Fe}^{2+}$ ) was measured using FerroOrange  
19 (DojinD) via flow cytometric analysis. Briefly, surface-stained cells were incubated with 1  $\mu\text{M}$   
20 FerroOrange in HBSS for 30 min at 37 °C, and analyzed directly via flow cytometry without further  
21 washing.

22 For **intracellular staining**, surface-stained cells were first fixed with 4% PFA and permeabilized with  
23 0.5% Triton-X in PBS. The cells were then stained with respective primary antibodies for 1 h at 4°C  
24 followed by 30 min staining with Alexa Fluor 488- or Alexa Fluor 647-conjugated secondary anti-Rabbit  
25 IgG (1:1000 Thermo Fisher, A-21206). The following rabbit anti-mouse intracellular primary antibodies  
26 were used: Ferritin Heavy Chain (FTH1, Cell Signaling Technology, 3998), Ferritin Light Chain (FTL,  
27 Abcam, ab69090) and HO-1 polyclonal antibody (ENZO, ADI-SPA-896).

28 The geometric mean fluorescence intensities (MFI) corresponding to the probes/target protein levels  
29 were determined by flow cytometry acquired on Aria II (BD Biosciences) or CytoFLEX (Beckman  
30 Coulter) and were analyzed with FlowJo or CytExpert, respectively. For the probes that have emissions  
31 in PE, TREML4 was excluded, and RPMs were gated as F4/80-high CD11b-dim. For quantifications,  
32 MFI of the adequate fluorescence minus one (FMO) controls were subtracted from samples MFI, and  
33 data were further normalized.

34

35

1 **ATP levels**

2 Cellular ATP levels in FACS-sorted RPMs (10 000 cells/sample) were determined using ATP  
3 Fluorometric Assay Kit (Sigma, MAK190), as per the manufacturer's instructions.

4 **Magnetic sorting of RPMs and isolation of extracellular iron-containing aggregates**

5  $60 \times 10^6$  of mouse splenocytes were incubated for 15 min at 4°C in PBS containing 5% Normal Rat  
6 Serum (Thermo Scientific, 10710C) and anti-CD16/32 (BioLegend, 101320) antibody in 5mL round  
7 bottom tube. Afterward, cells were labeled with anti-F4/80 (APC, BioLegend, 123116), anti-Ly-6G/Ly-  
8 6C (Gr-1) (Biotin, BioLegend, 108403), anti-CD3 (Biotin, BioLegend, 100243), anti-mouse Ly-6C  
9 (Biotin, BioLegend, 128003) and anti-B220 (Biotin, BioLegend, 103204) for 20 min in 4°C in dark.  
10 Next, cells were washed with cold PBS containing 2 mM EDTA, 0.5% BSA (hereafter referred to as  
11 "sorting buffer"), and centrifuged at 600g for 10 min. Pellet was resuspended in 400µL of sorting buffer  
12 containing 50µL of MojoSort Streptavidin Nanobeads (BioLegend, 480016) and kept in cold and dark  
13 for 15 min. After incubation, an additional 400µL was added to cells, and the tube was placed on  
14 EasyEights EasySep Magnet (STEMCELL, 18103) for 7 min. After that supernatant was transferred to  
15 a fresh 5mL tube and centrifuged at 600g for 10 min. Pellet was resuspended in 100µL of sorting buffer  
16 and 10µL of MojoSort Mouse anti-APC Nanobeads (BioLegend, 480072) was added. The suspension  
17 was gently pipetted and incubated for 15 min at 4°C in dark. Afterward, the tube was placed on a magnet  
18 for 7 min. Next, the supernatant was saved for analysis, and beads with attached F4/80+ cells were  
19 washed with sorting buffer and counted under a light microscope with a Neubauer chamber. Cells were  
20 pelleted and frozen in liquid nitrogen for further analysis.

21 For isolation of extracellular iron-containing aggregates, splenocytes were resuspended in HBSS and  
22 then carefully layered over Lymphosep (3:1) in a FACS tube, creating a sharp spleen cell suspension-  
23 Lymphosep interphase. Leukocytes were sorted out from the supernatant after density centrifugation at  
24 400g at 20°C for 25 min. The pellet comprising mostly RBCs, granulocytes, and extracellular iron-  
25 containing aggregates was then washed again with HBSS to remove Lymphosep. The cell pellet was re-  
26 suspended in a sorting buffer and then passed through a magnetized LS separation column (Miltenyi  
27 Biotec). The iron-containing superparamagnetic cells/aggregates were eluted from the demagnetized  
28 column, washed, and re-suspended in a sorting buffer. To achieve a pure yield of extracellular iron-  
29 containing aggregates and remove any trace contaminations from superparamagnetic RPMs or other  
30 leukocytes, cells expressing F4/80, B220, Gr-1, CD3, and Ly-6C were sorted out using MojoSort  
31 magnetic cell separation system as previously described. The remaining material comprising of mostly  
32 aggregates was washed thoroughly and either pelleted and frozen in liquid nitrogen for further analysis  
33 (mass spectrometry and iron/heme measurements) or stained with fluorophore-conjugated antibodies  
34 for purity verification with flow cytometry.

35

36

## 1 **Proteomic analyses of splenic aggregates using label-free quantification (LFQ)**

2 *Sample preparation.* Magnetically-isolated aggregates were dissolved in neat trifluoroacetic acid.  
3 Protein solutions were neutralized with 10 volumes of 2M Tris base, supplemented with TCEP (8mM)  
4 and chloroacetamide (32mM), heated to 95 °C for 5min, diluted with water 1:5, and subjected to  
5 overnight enzymatic digestion (0.5µg, Sequencing Grade Modified Trypsin, Promega) at 37 °C. Tryptic  
6 peptides were then incubated with Chelex 100 resin (25mg) for 1h at RT, desalted with the use of  
7 AttractSPE™ Disks Bio C18 (Affiniseq), and concentrated using a SpeedVac concentrator. Prior to LC-  
8 MS measurement, the samples were resuspended in 0.1% TFA, 2% acetonitrile in water.

9 *LC-MS/MS analysis.* Chromatographic separation was performed on an Easy-Spray Acclaim PepMap  
10 column 50cm long × 75µm inner diameter (Thermo Fisher Scientific) at 45°C by applying a 90 min  
11 acetonitrile gradients in 0.1% aqueous formic acid at a flow rate of 300nl/min. An UltiMate 3000 nano-  
12 LC system was coupled to a Q Exactive HF-X mass spectrometer via an easy-spray source (all Thermo  
13 Fisher Scientific). The Q Exactive HF-X was operated in data-dependent mode with survey scans  
14 acquired at a resolution of 120,000 at m/z 200. Up to 12 of the most abundant isotope patterns with  
15 charges 2-5 from the survey scan were selected with an isolation window of 1.3 m/z and fragmented by  
16 higher-energy collision dissociation (HCD) with normalized collision energies of 27, while the dynamic  
17 exclusion was set to 30s. The maximum ion injection times for the survey scan and the MS/MS scans  
18 (acquired with a resolution of 15,000 at m/z 200) were 45 and 96ms, respectively. The ion target value  
19 for MS was set to 3e6 and for MS/MS to 1e5, and the minimum AGC target was set to 1e3.

20 *Data processing.* The data were processed with MaxQuant v. 2.0.3.0 (Cox and Mann, 2008), and the  
21 peptides were identified from the MS/MS spectra searched against the reference mouse proteome  
22 UP000000589 (Uniprot.org) using the build-in Andromeda search engine. Raw files corresponding to 3  
23 replicate samples obtained from Ag isolates and 3 replicate samples obtained from Y isolates were  
24 processed together. Cysteine carbamidomethylation was set as a fixed modification and methionine  
25 oxidation, glutamine/asparagine deamidation, and protein N-terminal acetylation were set as variable  
26 modifications. For in silico digests of the reference proteome, cleavages of arginine or lysine followed  
27 by any amino acid were allowed (trypsin/P), and up to two missed cleavages were allowed. LFQ min.  
28 ratio count was set to 1. The FDR was set to 0.01 for peptides, proteins and sites. Match between runs  
29 was enabled. Other parameters were used as pre-set in the software. Unique and razor peptides were  
30 used for quantification enabling protein grouping (razor peptides are the peptides uniquely assigned to  
31 protein groups and not to individual proteins). Data were further analyzed using Perseus version 1.6.10.0  
32 (Tyanova et al., 2016) and Microsoft Office Excel 2016.

33 *Data processing and bioinformatics.* Intensity values for protein groups were loaded into Perseus v.  
34 1.6.10.0. Standard filtering steps were applied to clean up the dataset: reverse (matched to decoy  
35 database), only identified by site, and potential contaminants (from a list of commonly occurring  
36 contaminants included in MaxQuant) protein groups were removed. Reporter intensity values were  
37 normalized to the tissue weight the aggregates were isolated from and then Log2 transformed. Protein

1 groups with valid values in less than 2 Ag samples were removed. For protein groups with less than 2  
2 valid values in Y, missing values were imputed from a normal distribution (random numbers from the  
3 following range were used: downshift = 1.8StdDev, width = 0.4StdDev). One-sided Student T-testing  
4 (permutation-based FDR = 0.001, S0 = 1) was performed on the dataset to return 3290 protein groups  
5 whose levels were statistically significantly greater in Ag samples compared to Y samples. Annotation  
6 enrichment analysis was performed using DAVID (<https://david.ncifcrf.gov/>) and ShinyGO  
7 (<http://bioinformatics.sdstate.edu/go/>), using FDR=0,05 as a threshold.

## 8 **Proteomic analyses of splenic aggregates Tandem Mass Tag (TMT) labeling**

9 *Sample preparation.* Magnetically-isolated aggregates were dissolved in neat trifluoroacetic acid.  
10 Protein solutions were neutralized with 10 volumes of 2M Tris base, supplemented with TCEP (8mM)  
11 and chloroacetamide (32mM), heated to 95 °C for 5min, diluted with water 1:5, and subjected to  
12 overnight enzymatic digestion (0.5µg, Sequencing Grade Modified Trypsin, Promega) at 37 °C. Tryptic  
13 peptides were then incubated with Chelex 100 resin (25mg) for 1h at RT, desalted with the use of  
14 AttractSPE™ Disks Bio C18 (Affinise), TMT-labeled on the solid support (Myers et al., 2019),  
15 compiled into a single TMT sample and concentrated using a SpeedVac concentrator. Prior to LC-MS  
16 measurement, the samples were resuspended in 0.1% TFA, 2% acetonitrile in water.

17 *LC-MS/MS analysis.* Chromatographic separation was performed on an Easy-Spray Acclaim PepMap  
18 column 50cm long × 75µm inner diameter (Thermo Fisher Scientific) at 45°C by applying a 120 min  
19 acetonitrile gradients in 0.1% aqueous formic acid at a flow rate of 300nl/min. An UltiMate 3000 nano-  
20 LC system was coupled to a Q Exactive HF-X mass spectrometer via an easy-spray source (all Thermo  
21 Fisher Scientific). Three samples injections were performed. The Q Exactive HF-X was operated in  
22 data-dependent mode with survey scans acquired at a resolution of 60,000 at m/z 200. Up to 15 of the  
23 most abundant isotope patterns with charges 2-5 from the survey scan were selected with an isolation  
24 window of 0.7 m/z and fragmented by higher-energy collision dissociation (HCD) with normalized  
25 collision energies of 32, while the dynamic exclusion was set to 35s. The maximum ion injection times  
26 for the survey scan and the MS/MS scans (acquired with a resolution of 45,000 at m/z 200) were 50 and  
27 96ms, respectively. The ion target value for MS was set to 3e6 and for MS/MS to 1e5, and the minimum  
28 AGC target was set to 1e3.

29 *Data processing.* The data were processed with MaxQuant v. 1.6.17.0 (Cox and Mann, 2008), and the  
30 peptides were identified from the MS/MS spectra searched against the reference mouse proteome  
31 UP000000589 (Uniprot.org) using the build-in Andromeda search engine. Raw files corresponding to 3  
32 replicate injections of the combined TMT sample were processed together as a single experiment/single  
33 fraction. Cysteine carbamidomethylation was set as a fixed modification and methionine oxidation,  
34 glutamine/asparagine deamidation, and protein N-terminal acetylation were set as variable  
35 modifications. For in silico digests of the reference proteome, cleavages of arginine or lysine followed  
36 by any amino acid were allowed (trypsin/P), and up to two missed cleavages were allowed. Reporter ion

1 MS2 quantification was performed with the min. reporter PIF was set to 0.75. The FDR was set to 0.01  
2 for peptides, proteins and sites. Match between runs was enabled and second peptides function was  
3 disabled. Other parameters were used as pre-set in the software. Unique and razor peptides were used  
4 for quantification enabling protein grouping (razor peptides are the peptides uniquely assigned to protein  
5 groups and not to individual proteins). Data were further analyzed using Perseus version 1.6.10.0  
6 (Tyanova et al., 2016) and Microsoft Office Excel 2016.

7 *Data processing and bioinformatics.* Reporter intensity corrected values for protein groups were loaded  
8 into Perseus v. 1.6.10.0. Standard filtering steps were applied to clean up the dataset: reverse (matched  
9 to decoy database), only identified by site, and potential contaminants (from a list of commonly  
10 occurring contaminants included in MaxQuant) protein groups were removed. Reporter intensity values  
11 were Log<sub>2</sub> transformed and normalized by median subtraction within TMT channels. 942 Protein groups  
12 with the complete set of valid values were kept. Student T-testing (permutation-based FDR = 0.05, S<sub>0</sub>  
13 = 0.1) was performed on the dataset to return 70 protein groups, which levels were statistically  
14 significantly changed in Ag vs IR samples. Annotation enrichment analysis was performed using  
15 DAVID (<https://david.ncifcrf.gov/>) and ShinyGO (<http://bioinformatics.sdstate.edu/go/>), using  
16 FDR=0,05 as a threshold.

#### 17 **Measurement of cellular iron levels**

18 Determination of cellular total iron levels in magnetically-sorted RPMs was carried out using the Iron  
19 assay Kit (Sigma-Aldrich, MAK025) according to the manufacturer's instructions, and as shown  
20 previously (Folgueras et al., 2018). Iron concentrations (ng/μL) were calculated from the standard curve  
21 and normalized to the number of cells for each sample.

#### 22 **RBCs *in vivo* lifespan**

23 EZ-Link Sulfo-NHS Biotin (Thermo Scientific, 21217) was dissolved in sterile PBS to a final  
24 concentration of 1mg per 100μL and filtered through a 0,1μm filter (Millipore, SLVV033RS). A day  
25 before the first blood collection, 100μL of the sterile solution was injected intravenously into mice. On  
26 days 0, 4, 11, 18, and 25 approximately 10 μL of whole blood was collected from the tail vein with  
27 heparinized capillary to a tube containing HBSS. RBCs were centrifuged at 400g for 5 min at 4°C. Each  
28 sample was resuspended in 250μL of HBSS containing 5% normal rat serum (Thermo Scientific). Then  
29 2μL of fluorescently labeled anti-TER-119 and streptavidin was added to the suspension. Fluorescent  
30 streptavidin was omitted for FMO samples in each group. After incubation at 4°C for 30 min, samples  
31 were centrifuged and resuspended with HBSS. The percentage of biotinylated erythrocytes was  
32 determined by flow cytometry.

33

34

35



## 1 **Preparation of stressed erythrocytes for erythrophagocytosis assays**

2 Preparation and staining of stressed RBCs (sRBCs) were performed as described before (Theurl et al.,  
3 2016), with some modifications. **Preparation of RBCs:** Mice were sacrificed and whole blood was  
4 aseptically collected *via* cardiac puncture to CPDA-1 solution (Sigma-Aldrich, C4431). The final  
5 concentration of CPDA-1 was 10%. Whole blood obtained from mice was pooled and then centrifuged  
6 at 400g for 15 min at 4°C. Plasma was collected and filtered through a 0.1µm filter and stored at 4°C.  
7 RBCs were resuspended in HBSS and leukoreduced using Lymphosep (Biowest, L0560-500). Cells  
8 were washed with HBSS and then heated for 30 min at 48°C while continuously shaking, generating  
9 sRBC. **Staining of sRBCs:**  $1 \times 10^{10}$  RBC were resuspended in 1 ml diluent C, mixed with 1 ml diluent  
10 C containing 4µM PKH-67 (Sigma-Aldrich, MIDI67-1KT) and incubated in dark for 5 min in 37°C, the  
11 reaction was stopped by adding 10mL HBSS containing 2% FCS and 0.5% BSA. Staining was followed  
12 by two washing steps with HBSS. For *in vitro* and *ex vivo* erythrophagocytosis assay cells were  
13 resuspended in RPMI-1640 and counted.  
14 For *in vivo* approach, RBCs were resuspended to 50% hematocrit in previously collected and filtered  
15 plasma.

## 16 ***In vitro* erythrophagocytosis**

17 Stained and counted sRBCs were added to iRPMs on 12-well plates in 10 fold excess for 1.5h in 37°C,  
18 5% CO<sub>2</sub> on the 8<sup>th</sup> day after seeding. After that cells were extensively washed with cold PBS to discard  
19 not engulfed sRBCs. Next, cells were detached with Accutase (BioLegend, 423201), transferred to a  
20 round bottom tube, washed with HBSS, and centrifuged at 600g for 5 min. Cells were labeled with  
21 antibodies and analyzed by flow cytometry.

## 22 ***In vivo* erythrophagocytosis**

23 Mice were injected into the tail vein with 100µL of RBCs resuspended in plasma to 50% hematocrit.  
24 Mice were maintained for 1.5h in cages with constant access to water and food. After that time animals  
25 were sacrificed for organ isolation.

## 26 ***Ex vivo* phagocytosis and erythrophagocytosis**

27  $10 \times 10^6$  splenocytes were resuspended in a 5mL round bottom tube in 200µL of warm complete RPMI-  
28 1640. Fluorescent sRBCs or fluorescent Zymosan A particles (Invitrogen, Z23373) were added to cells  
29 at ratio 10:1 (sRBCs/Zymosan : Cells) for 1.5h at 37°C, 5% CO<sub>2</sub>. Afterward, cells were centrifuged at  
30 600g for 5 min. Excess of sRBCs was lysed using 1X RBCs lysis buffer, cells were washed with HBSS  
31 and centrifuged. Next, cells were labeled with fluorescent antibodies and analyzed by flow cytometry.

## 32 **Heme content analysis**

33 The whole spleen was weighted, quickly dissected and gently mashed through a 100µm strainer in the  
34 presence of 3mL HBSS. After that suspension was centrifuged at 400g for 10 min at 4°C. A splenocyte

1 pellet was used for different purposes and 1mL of heme-containing supernatant was transferred to a  
2 1,5mL tube and centrifuged at 1000g for 10 min at 4°C.

3 Splenic aggregates were isolated as previously described and were suspended in ddH<sub>2</sub>O water. Heme  
4 concentration was measured using Heme Assay Kit (Sigma-Aldrich, MAK316) according to  
5 manufacturer instructions. Absorbance was measured at 400nm. The amount of heme was calculated  
6 against Heme Calibrator and normalized to the initial weight of fresh spleens.

### 7 **Transferrin saturation and tissue iron measurements**

8 Serum iron and unsaturated iron-binding capacity were measured with SFBC (Biolabo, 80008) and  
9 UIBC (Biolabo, 97408) kits according to manufacturer protocols. Transferrin saturation was calculated  
10 using the formula  $SFBC/(SFBC+UIBC) \times 100$ . For measurement of tissue non-heme iron content, the  
11 bathophenanthroline method was applied and calculations were made against dry weight tissue, as  
12 described previously (Torrance and Bothwell, 1968).

### 13 **Erythropoietin (EPO) measurement with ELISA**

14 The plasma levels of erythropoietin were measured by Mouse Erythropoietin/EPO Quantikine ELISA  
15 Kit (R&D Systems, MEP00B) according to the manufacturer's instructions. The optical density was  
16 measured on a microplate reader at a wavelength of 450nm with wavelength correction set to 570nm.

### 17 **RNA isolation**

18 RNA from sorted cells was isolated from TRIzol LS Reagent (Invitrogen, 10296028) using Direct-zol  
19 RNA Microprep Kit (Zymo Research, R2062) according to the manufacturer's instructions. RNA from  
20 tissues was isolated from TRIzol Reagent (Invitrogen, 15596018) following the guidelines of the  
21 manufacturer protocol.

### 22 **Reverse transcription and qRT-PCR**

23 cDNA was synthesized with RevertAid H Minus Reverse Transcriptase (Thermo Scientific, EP0452)  
24 according to manufacturer guidelines. Real-time PCR was performed by using SG qPCR Master Mix  
25 (EURx, E0401) and HAMP gene primers (Forward 5'-ATACCAATGCAGAAGAGAAGG-3', Reverse  
26 5'-AACAGATACCACACTGGGAA-3') as described in manufacturer protocol. qRT-PCR was run on  
27 LightCycler 96 System (Roche).

### 28 **Histological and histochemical analysis**

29 Following fixation in 10% formalin for 24 h, spleens were stored in 70% ethanol before further  
30 preparation. The tissue was embedded in paraffin and 7- $\mu$ m cross-sections were cut with a microtome  
31 (Reichert-Jung, Germany). The sections were stained with hematoxylin and eosin. Slides were examined  
32 by light microscopy (Olympus, type CH2). Non-heme iron staining of spleen samples was analyzed  
33 using Accustain Iron Deposition Kit (Sigma). Sections were prepared as described above. After  
34 mounting on glass slides, sections were deparaffinized, incubated with a working solution containing

1 Perls' Prussian Blue for 30 min, counterstained with pararosaniline solution for 2 min and analyzed  
2 under standard light microscopy (Olympus CH2).

### 3 **Transmission electron microscopy (TEM) of the spleen**

4 Fresh samples of the spleen, about 3 square mm, were fixed in 2.5% glutaraldehyde for 24 h at 4°C, then  
5 washed in PBS and postfixated with 1 % osmium tetroxide for 1 h. After washing with water they were  
6 incubated with 1% aqueous uranyl acetate for 12 h at 4°C. Next, samples were dehydrated at room  
7 temperature with increasing concentrations of ethanol, infiltrated with epoxy resin (Sigma Aldrich, St.  
8 Louis, MO, USA, #45-359-1EA-F) and subjected for polymerization for 48 h at 60°C. Polymerized resin  
9 blocks were trimmed with a tissue processor (Leica EM TP), cut with an ultramicrotome (EM UC7,  
10 Leica) for ultrathin sections (65 nm thick), and collected on nickel grids, mesh 200 (Agar Scientific,  
11 G2200N). Specimen grids were examined with a transmission electron microscope Tecnai T12 BioTwin  
12 (FEI, Hillsboro, OR, USA) equipped with a 16 megapixel TemCam-F416 (R) camera (TVIPS GmbH)  
13 at in-house Microscopy and Cytometry Facility.

14

### 15 **Transcriptome analysis by RNA-seq**

16 To prepare libraries from FACS-sorted RPMs (at least 100 000 cells/sample), we used the previously  
17 described Smart-seq2 protocol (Picelli et al., 2013), suitable for low-input total mRNA sequencing. The  
18 quality of RNA and material during the preparation of libraries was checked by Bioanalyzer. The  
19 samples were sequenced on NextSeq500 (Illumina) with 75 bp single-end reads, with ~50 million  
20 reads/sample. RNAseq was performed at GeneCore at EMBL (Heidelberg, Germany). The quality of  
21 the reads was assessed with FastQC software  
22 [<https://www.bioinformatics.babraham.ac.uk/projects/fastqc/>]. Reads were mapped to the Mus  
23 musculus genome assembly GRCm38(mm10) with HISAT2 software  
24 [<http://daehwankimlab.github.io/hisat2/>] on default parameters. Then, the mapped reads were counted  
25 into Ensembl annotation intervals using HTSeq-count software  
26 [<https://www.ncbi.nlm.nih.gov/labs/pmc/articles/PMC4287950/>]. Differentially expressed genes were  
27 estimated using DESeq2 software [<https://www.ncbi.nlm.nih.gov/labs/pmc/articles/PMC4302049/>]  
28 with default parameters. Genes with p-adjusted < 0.05 were regarded as differentially expressed and  
29 included in further analysis. Functional analysis was conducted using ClusterProfiler  
30 [<https://doi.org/10.1016/j.xinn.2021.100141>].

### 31 **Statistical analysis**

32 Female mice of the same age were randomly attributed to experimental groups (diets or NAC  
33 administration). Mouse-derived samples were collected randomly within groups and often  
34 assessed/measured randomly, and groups were harvested in a different order in individual experiments.  
35 The investigators were not blinded during experiments and assessments. Sample size (typically 4-7  
36 mice/group or independent biological cell-based experiments) was determined based on power analysis,

1 prior experience of performing similar experiments, and previously published papers in the field of RPM  
2 biology (Akilesh et al., 2019; Lu et al., 2020; Ma et al., 2021; Okreglicka et al., 2021). Statistical analysis  
3 was performed with GraphPad Prism (GraphPad software, Version 9). Data are represented as mean  $\pm$   
4 SEM, unless otherwise specified. ROUT method was applied (in rare cases) to identify and remove  
5 outliers. For all experiments,  $\alpha=0.05$ . When two groups were compared two-tailed unpaired Welch's t-  
6 test was applied, whereas for multiple comparisons, the One-Way Analysis of Variance (ANOVA) test  
7 was performed. For ANOVA, Dunnett's Multiple Comparison test was used for experiments comparing  
8 multiple experimental groups to a single control, while post-hoc Tukey's test was used to compare  
9 multiple experimental groups. The number of mice/samples per group or the number of independent  
10 cell-based experiments are shown in the figures. Results were considered as significant for  $p < 0.05$ , \*\*  
11 - p (\* -  $p < 0.05$ , \*\* -  $p < 0.01$ , \*\*\* -  $p < 0.001$ , \*\*\*\* -  $p < 0.0001$ ).

12

### 13 **Data availability**

14 RNA sequencing data are deposited in the GEO repository (under accession no: GSE199879). The  
15 following secure token has been created to allow review of record while it remains in private status:  
16 izgfeykoxjzlyt. Mass spectrometry proteomics data were deposited to the ProteomeXchange  
17 Consortium via the PRIDE partner repository with the dataset identifier PXD032900. These data can be  
18 accessed via the Reviewer account: Username: [reviewer\\_pxd032900@ebi.ac.uk](mailto:reviewer_pxd032900@ebi.ac.uk); Password: Z4AfdopG.

19

### 20 **Author contribution**

21 Conceptualization: PS, PKM, WP, KMS; Formal analysis: PS, PKM, GZ, OK, MMa, AS, MM, ML,  
22 RS, WP, KMS; Funding acquisition: MM, ML, WP, KMS, Investigation: PS, PKM, GZ, MN, KKC,  
23 SH, MMa, AS, ML, KMS; Methodology: PS, KPM, GZ, MC, OK, SH, MMa, AS, ML, RS, KMS;  
24 Project administration: WP, KMS; Resources: WP, KMS; Supervision: WP, KMS; Validation: MM,  
25 ML, WP, KMS; Visualization: PS, PKM, GZ, OK, MMa, ML, KMS; Writing – original draft: PS, PKM,  
26 KMS; Writing – review & editing: WP, KMS.

27

### 28 **Acknowledgments**

29 We thank the GeneCore team (EMBL, Heidelberg) for performing RNA sequencing. We thank Tara  
30 Arvedson (Amgen Inc., USA) for the anti-ferroportin antibody. Many thanks to Agnieszka Popielska  
31 and the staff of the Experimental Medicine Centre (Bialystok, Poland) for their technical support.  
32 Proteomic measurements were performed at the Proteomics Core Facility, IMol Polish Academy of  
33 Sciences utilizing the equipment funded by the 'Regenerative Mechanisms for Health' project  
34 MAB/2017/2 within the International Research Agendas program of the Foundation for Polish Science,  
35 co-financed by the European Union under the European Regional Development Fund. We thank Dr.  
36 Dorota Stadnik for the preparation and measurement of the proteomic samples and Dawid Hatala for his  
37 assistance in histological analyses. We acknowledge the help of Raffaella Gozzellino in the initial phase

1 of project conceptualization. WP and KMS acknowledge internal IIMCB funding for inter-lab projects.  
2 WP acknowledges funding from Norwegian Financial Mechanism 2014-2021 and operated by the  
3 Polish National Science Center under the project contract no UMO-2019/34/H/NZ3/00691 and  
4 European Molecular Biology Organization (EMBO Installation Grant No. 3916). KMS acknowledges  
5 funding from the National Science Centre Sonata Bis grant (UMO-2020/38/E/NZ4/00511). The model  
6 figure was prepared using BioRender.com.

## 7 **Competing interests**

8 The authors declare no conflict of interest.

## 9 **References**

- 10 Akilesh, H.M., Buechler, M.B., Duggan, J.M., Hahn, W.O., Matta, B., Sun, X., Gessay, G., Whalen, E.,  
11 Mason, M., Presnell, S.R., *et al.* (2019). Chronic TLR7 and TLR9 signaling drives anemia via  
12 differentiation of specialized hemophagocytes. *Science* 363.
- 13 Altamura, S., Kessler, R., Grone, H.J., Gretz, N., Hentze, M.W., Galy, B., and Muckenthaler, M.U.  
14 (2014). Resistance of ferroportin to hepcidin binding causes exocrine pancreatic failure and fatal iron  
15 overload. *Cell Metab* 20, 359-367.
- 16 Arashiki, N., Kimata, N., Manno, S., Mohandas, N., and Takakuwa, Y. (2013). Membrane peroxidation  
17 and methemoglobin formation are both necessary for band 3 clustering: mechanistic insights into human  
18 erythrocyte senescence. *Biochemistry* 52, 5760-5769.
- 19 Arruda, L.F., Arruda, S.F., Campos, N.A., de Valencia, F.F., and Siqueira, E.M. (2013). Dietary iron  
20 concentration may influence aging process by altering oxidative stress in tissues of adult rats. *PLoS One*  
21 8, e61058.
- 22 Aschemeyer, S., Qiao, B., Stefanova, D., Valore, E.V., Sek, A.C., Ruwe, T.A., Vieth, K.R., Jung, G.,  
23 Casu, C., Rivella, S., *et al.* (2018). Structure-function analysis of ferroportin defines the binding site and  
24 an alternative mechanism of action of hepcidin. *Blood* 131, 899-910.
- 25 Atamna, H., Killilea, D.W., Killilea, A.N., and Ames, B.N. (2002). Heme deficiency may be a factor in  
26 the mitochondrial and neuronal decay of aging. *Proc Natl Acad Sci U S A* 99, 14807-14812.
- 27 Baik, S.H., Kang, S., Son, S.M., and Mook-Jung, I. (2016). Microglia contributes to plaque growth by  
28 cell death due to uptake of amyloid beta in the brain of Alzheimer's disease mouse model. *Glia* 64, 2274-  
29 2290.
- 30 Bennett, L.F., Liao, C., Quickel, M.D., Yeoh, B.S., Vijay-Kumar, M., Hankey-Giblin, P., Prabhu, K.S.,  
31 and Paulson, R.F. (2019). Inflammation induces stress erythropoiesis through heme-dependent  
32 activation of SPI-C. *Sci Signal* 12.
- 33 Berman, A.E., Chan, W.Y., Brennan, A.M., Reyes, R.C., Adler, B.L., Suh, S.W., Kauppinen, T.M.,  
34 Edling, Y., and Swanson, R.A. (2011). N-acetylcysteine prevents loss of dopaminergic neurons in the  
35 EAAC1<sup>-/-</sup> mouse. *Ann Neurol* 69, 509-520.
- 36 Bian, Z., Shi, L., Guo, Y.L., Lv, Z., Tang, C., Niu, S., Tremblay, A., Venkataramani, M., Culpepper, C.,  
37 Li, L., *et al.* (2016). Cd47-Sirpalpha interaction and IL-10 constrain inflammation-induced macrophage  
38 phagocytosis of healthy self-cells. *Proc Natl Acad Sci U S A* 113, E5434-5443.
- 39 Bories, G.F.P., Yeudall, S., Serbulea, V., Fox, T.E., Isakson, B.E., and Leitinger, N. (2020). Macrophage  
40 metabolic adaptation to heme detoxification involves CO-dependent activation of the pentose phosphate  
41 pathway. *Blood* 136, 1535-1548.
- 42 Bratosin, D., Mazurier, J., Tissier, J.P., Estaquier, J., Huart, J.J., Ameisen, J.C., Aminoff, D., and  
43 Montreuil, J. (1998). Cellular and molecular mechanisms of senescent erythrocyte phagocytosis by  
44 macrophages. A review. *Biochimie* 80, 173-195.

- 1 Camins, A., Verdager, E., Folch, J., and Pallas, M. (2006). Involvement of calpain activation in  
2 neurodegenerative processes. *CNS Drug Rev* 12, 135-148.
- 3 Chen, X., Comish, P.B., Tang, D., and Kang, R. (2021). Characteristics and Biomarkers of Ferroptosis.  
4 *Front Cell Dev Biol* 9, 637162.
- 5 Chung, S.W., Liu, X., Macias, A.A., Baron, R.M., and Perrella, M.A. (2008). Heme oxygenase-1-  
6 derived carbon monoxide enhances the host defense response to microbial sepsis in mice. *J Clin Invest*  
7 118, 239-247.
- 8 Cook, C.I., and Yu, B.P. (1998). Iron accumulation in aging: modulation by dietary restriction. *Mech*  
9 *Ageing Dev* 102, 1-13.
- 10 Cox, J., and Mann, M. (2008). MaxQuant enables high peptide identification rates, individualized p.p.b.-  
11 range mass accuracies and proteome-wide protein quantification. *Nat Biotechnol* 26, 1367-1372.
- 12 Cronin, S.J.F., Woolf, C.J., Weiss, G., and Penninger, J.M. (2019). The Role of Iron Regulation in  
13 Immunometabolism and Immune-Related Disease. *Front Mol Biosci* 6, 116.
- 14 Delaby, C., Rondeau, C., Pouzet, C., Willemetz, A., Pilard, N., Desjardins, M., and Canonne-Hergaux,  
15 F. (2012). Subcellular localization of iron and heme metabolism related proteins at early stages of  
16 erythrophagocytosis. *PLoS One* 7, e42199.
- 17 Dixon, S.J., Lemberg, K.M., Lamprecht, M.R., Skouta, R., Zaitsev, E.M., Gleason, C.E., Patel, D.N.,  
18 Bauer, A.J., Cantley, A.M., Yang, W.S., *et al.* (2012). Ferroptosis: an iron-dependent form of  
19 nonapoptotic cell death. *Cell* 149, 1060-1072.
- 20 Even, B., Fayad-Kobeissi, S., Gagliolo, J.M., Motterlini, R., Boczkowski, J., Foresti, R., and  
21 Dagouassat, M. (2018). Heme oxygenase-1 induction attenuates senescence in chronic obstructive  
22 pulmonary disease lung fibroblasts by protecting against mitochondria dysfunction. *Aging Cell* 17,  
23 e12837.
- 24 Folgueras, A.R., Freitas-Rodriguez, S., Ramsay, A.J., Garabaya, C., Rodriguez, F., Velasco, G., and  
25 Lopez-Otin, C. (2018). Matriptase-2 deficiency protects from obesity by modulating iron homeostasis.  
26 *Nat Commun* 9, 1350.
- 27 Fox, J.B., S.; Davisson, M.; Newcomer, C.; Quimby, F.; Smith, A. (editors) (2006). *The Mouse in*  
28 *Biomedical Research. Elsevier, AP.*
- 29 Franken, L., Klein, M., Spasova, M., Elsukova, A., Wiedwald, U., Welz, M., Knolle, P., Farle, M.,  
30 Limmer, A., and Kurts, C. (2015). Splenic red pulp macrophages are intrinsically superparamagnetic  
31 and contaminate magnetic cell isolates. *Sci Rep* 5, 12940.
- 32 Friedmann Angeli, J.P., Schneider, M., Proneth, B., Tyurina, Y.Y., Tyurin, V.A., Hammond, V.J.,  
33 Herbach, N., Aichler, M., Walch, A., Eggenhofer, E., *et al.* (2014). Inactivation of the ferroptosis  
34 regulator Gpx4 triggers acute renal failure in mice. *Nat Cell Biol* 16, 1180-1191.
- 35 Ganz, T. (2012). Macrophages and systemic iron homeostasis. *J Innate Immun* 4, 446-453.
- 36 Girelli, D., Marchi, G., and Camaschella, C. (2018). Anemia in the Elderly. *Hemasphere* 2, e40.
- 37 Gottlieb, Y., Topaz, O., Cohen, L.A., Yakov, L.D., Haber, T., Morgenstern, A., Weiss, A., Chait  
38 Berman, K., Fibach, E., and Meyron-Holtz, E.G. (2012). Physiologically aged red blood cells undergo  
39 erythrophagocytosis in vivo but not in vitro. *Haematologica* 97, 994-1002.
- 40 Gozzelino, R., Jeney, V., and Soares, M.P. (2010). Mechanisms of cell protection by heme oxygenase-  
41 1. *Annu Rev Pharmacol Toxicol* 50, 323-354.
- 42 Guida, C., Altamura, S., Klein, F.A., Galy, B., Boutros, M., Ulmer, A.J., Hentze, M.W., and  
43 Muckenthaler, M.U. (2015). A novel inflammatory pathway mediating rapid hepcidin-independent  
44 hypoferremia. *Blood* 125, 2265-2275.
- 45 Haldar, M., Kohyama, M., So, A.Y., Kc, W., Wu, X., Briseno, C.G., Satpathy, A.T., Kretzer, N.M.,  
46 Arase, H., Rajasekaran, N.S., *et al.* (2014). Heme-mediated SPI-C induction promotes monocyte  
47 differentiation into iron-recycling macrophages. *Cell* 156, 1223-1234.

- 1 Hamza, I., and Dailey, H.A. (2012). One ring to rule them all: trafficking of heme and heme synthesis  
2 intermediates in the metazoans. *Biochim Biophys Acta* 1823, 1617-1632.
- 3 Harrison, P.M., and Arosio, P. (1996). The ferritins: molecular properties, iron storage function and  
4 cellular regulation. *Biochim Biophys Acta* 1275, 161-203.
- 5 Hashimoto, D., Chow, A., Noizat, C., Teo, P., Beasley, M.B., Leboeuf, M., Becker, C.D., See, P., Price,  
6 J., Lucas, D., *et al.* (2013). Tissue-resident macrophages self-maintain locally throughout adult life with  
7 minimal contribution from circulating monocytes. *Immunity* 38, 792-804.
- 8 Hedblom, A., Hejazi, S.M., Canesin, G., Choudhury, R., Hanafy, K.A., Csizmadia, E., Persson, J.L.,  
9 and Wegiel, B. (2019). Heme detoxification by heme oxygenase-1 reinstates proliferative and immune  
10 balances upon genotoxic tissue injury. *Cell Death Dis* 10, 72.
- 11 Higgins, J.M. (2015). Red blood cell population dynamics. *Clin Lab Med* 35, 43-57.
- 12 Kautz, L., Meynard, D., Monnier, A., Darnaud, V., Bouvet, R., Wang, R.H., Deng, C., Vaulont, S.,  
13 Mosser, J., Coppin, H., *et al.* (2008). Iron regulates phosphorylation of Smad1/5/8 and gene expression  
14 of Bmp6, Smad7, Id1, and Atoh8 in the mouse liver. *Blood* 112, 1503-1509.
- 15 Kelley, V.A., and Schorey, J.S. (2003). Mycobacterium's arrest of phagosome maturation in  
16 macrophages requires Rab5 activity and accessibility to iron. *Mol Biol Cell* 14, 3366-3377.
- 17 Kenkhuis, B., Somarakis, A., de Haan, L., Dzyubachyk, O., ME, I.J., de Miranda, N., Lelieveldt, B.P.F.,  
18 Dijkstra, J., van Roon-Mom, W.M.C., Hollt, T., *et al.* (2021). Iron loading is a prominent feature of  
19 activated microglia in Alzheimer's disease patients. *Acta Neuropathol Commun* 9, 27.
- 20 Kim, A., Fung, E., Parikh, S.G., Valore, E.V., Gabayan, V., Nemeth, E., and Ganz, T. (2014). A mouse  
21 model of anemia of inflammation: complex pathogenesis with partial dependence on hepcidin. *Blood*  
22 123, 1129-1136.
- 23 Kim, S.H., Cho, S.N., Lim, Y.J., Choi, J.A., Lee, J., Go, D., and Song, C.H. (2018). Phagocytosis  
24 influences the intracellular survival of Mycobacterium smegmatis via the endoplasmic reticulum stress  
25 response. *Cell Biosci* 8, 52.
- 26 Klang, I.M., Schilling, B., Sorensen, D.J., Sahu, A.K., Kapahi, P., Andersen, J.K., Swoboda, P., Killilea,  
27 D.W., Gibson, B.W., and Lithgow, G.J. (2014). Iron promotes protein insolubility and aging in *C.*  
28 *elegans*. *Aging (Albany NY)* 6, 975-991.
- 29 Klei, T.R., Meinderts, S.M., van den Berg, T.K., and van Bruggen, R. (2017). From the Cradle to the  
30 Grave: The Role of Macrophages in Erythropoiesis and Erythrophagocytosis. *Front Immunol* 8, 73.
- 31 Klei, T.R.L., Dalimot, J., Nota, B., Veldthuis, M., Mul, F.P.J., Rademakers, T., Hoogenboezem, M.,  
32 Nagelkerke, S.Q., van, I.W.F.J., Oole, E., *et al.* (2020). Hemolysis in the spleen drives erythrocyte  
33 turnover. *Blood* 136, 1579-1589.
- 34 Kohyama, M., Ise, W., Edelson, B.T., Wilker, P.R., Hildner, K., Mejia, C., Frazier, W.A., Murphy, T.L.,  
35 and Murphy, K.M. (2009). Role for Spi-C in the development of red pulp macrophages and splenic iron  
36 homeostasis. *Nature* 457, 318-321.
- 37 Kovtunovych, G., Eckhaus, M.A., Ghosh, M.C., Ollivierre-Wilson, H., and Rouault, T.A. (2010).  
38 Dysfunction of the heme recycling system in heme oxygenase 1-deficient mice: effects on macrophage  
39 viability and tissue iron distribution. *Blood* 116, 6054-6062.
- 40 Kurz, T., Eaton, J.W., and Brunk, U.T. (2011). The role of lysosomes in iron metabolism and recycling.  
41 *Int J Biochem Cell Biol* 43, 1686-1697.
- 42 Lieberman, A.P., Shakkottai, V.G., and Albin, R.L. (2019). Polyglutamine Repeats in  
43 Neurodegenerative Diseases. *Annu Rev Pathol* 14, 1-27.
- 44 Liu, J.L., Fan, Y.G., Yang, Z.S., Wang, Z.Y., and Guo, C. (2018). Iron and Alzheimer's Disease: From  
45 Pathogenesis to Therapeutic Implications. *Front Neurosci* 12, 632.
- 46 Liu, Z., Gu, Y., Chakarov, S., Bleriot, C., Kwok, I., Chen, X., Shin, A., Huang, W., Dress, R.J., Dutertre,  
47 C.A., *et al.* (2019). Fate Mapping via Ms4a3-Expression History Traces Monocyte-Derived Cells. *Cell*  
48 178, 1509-1525 e1519.

- 1 Lu, Y., Basatemur, G., Scott, I.C., Chiarugi, D., Clement, M., Harrison, J., Jugdaohsingh, R., Yu, X.,  
2 Newland, S.A., Jolin, H.E., *et al.* (2020). Interleukin-33 Signaling Controls the Development of Iron-  
3 Recycling Macrophages. *Immunity* 52, 782-793 e785.
- 4 Luo, W., Wang, Y., Yang, H., Dai, C., Hong, H., Li, J., Liu, Z., Guo, Z., Chen, X., He, P., *et al.* (2018).  
5 Heme oxygenase-1 ameliorates oxidative stress-induced endothelial senescence via regulating  
6 endothelial nitric oxide synthase activation and coupling. *Aging (Albany NY)* 10, 1722-1744.
- 7 Lutz, H.U. (2012). Naturally Occurring Antibodies (NAbs). *Advances in experimental medicine and*  
8 *biology* 750, 0065-2598.
- 9 Ma, S., Dubin, A.E., Zhang, Y., Mousavi, S.A.R., Wang, Y., Coombs, A.M., Loud, M., Andolfo, I., and  
10 Patapoutian, A. (2021). A role of PIEZO1 in iron metabolism in mice and humans. *Cell* 184, 969-982  
11 e913.
- 12 Ma, Y., Gao, M., and Liu, D. (2016). N-acetylcysteine Protects Mice from High Fat Diet-induced  
13 Metabolic Disorders. *Pharm Res* 33, 2033-2042.
- 14 Martins, R., Maier, J., Gorki, A.D., Huber, K.V., Sharif, O., Starkl, P., Saluzzo, S., Quattrone, F.,  
15 Gawish, R., Lakovits, K., *et al.* (2016). Heme drives hemolysis-induced susceptibility to infection via  
16 disruption of phagocyte functions. *Nat Immunol* 17, 1361-1372.
- 17 Matsushita, M., Freigang, S., Schneider, C., Conrad, M., Bornkamm, G.W., and Kopf, M. (2015). T cell  
18 lipid peroxidation induces ferroptosis and prevents immunity to infection. *J Exp Med* 212, 555-568.
- 19 Mebius, R.E., and Kraal, G. (2005). Structure and function of the spleen. *Nature reviews Immunology*  
20 5, 606-616.
- 21 Medinas, D.B., Valenzuela, V., and Hetz, C. (2017). Proteostasis disturbance in amyotrophic lateral  
22 sclerosis. *Human molecular genetics* 26, R91-R104.
- 23 Mlecenko-Sanecka, K., and Silvestri, L. (2021). Cell-type-specific insights into iron regulatory processes.  
24 *Am J Hematol* 96, 110-127.
- 25 Muckenthaler, M.U., Rivella, S., Hentze, M.W., and Galy, B. (2017). A Red Carpet for Iron Metabolism.  
26 *Cell* 168, 344-361.
- 27 Myers, S.A., Rhoads, A., Cocco, A.R., Peckner, R., Haber, A.L., Schweitzer, L.D., Krug, K., Mani,  
28 D.R., Clauser, K.R., Rozenblatt-Rosen, O., *et al.* (2019). Streamlined Protocol for Deep Proteomic  
29 Profiling of FAC-sorted Cells and Its Application to Freshly Isolated Murine Immune Cells. *Mol Cell*  
30 *Proteomics* 18, 995-1009.
- 31 Ndayisaba, A., Kaindlstorfer, C., and Wenning, G.K. (2019). Iron in Neurodegeneration - Cause or  
32 Consequence? *Front Neurosci* 13, 180.
- 33 Neitemeier, S., Jelinek, A., Laino, V., Hoffmann, L., Eisenbach, I., Eying, R., Ganjam, G.K., Dolga,  
34 A.M., Oppermann, S., and Culmsee, C. (2017). BID links ferroptosis to mitochondrial cell death  
35 pathways. *Redox Biol* 12, 558-570.
- 36 Nemeth, E., Tuttle, M.S., Powelson, J., Vaughn, M.B., Donovan, A., Ward, D.M., Ganz, T., and Kaplan,  
37 J. (2004). Heparin regulates cellular iron efflux by binding to ferroportin and inducing its  
38 internalization. *Science* 306, 2090-2093.
- 39 Nikolich-Zugich, J. (2018). The twilight of immunity: emerging concepts in aging of the immune  
40 system. *Nat Immunol* 19, 10-19.
- 41 Okreglicka, K., Iten, I., Pohlmeier, L., Onder, L., Feng, Q., Kurrer, M., Ludewig, B., Nielsen, P.,  
42 Schneider, C., and Kopf, M. (2021). PPARgamma is essential for the development of bone marrow  
43 erythroblastic island macrophages and splenic red pulp macrophages. *J Exp Med* 218.
- 44 Olonisakin, T.F., Suber, T.L., Gonzalez-Ferrer, S., Xiong, Z., Penaloza, H.F., van der Geest, R., Xiong,  
45 Y., Osei-Hwedie, D.O., Tejero, J., Rosengart, M.R., *et al.* (2020). Stressed erythrophagocytosis induces  
46 immunosuppression during sepsis through heme-mediated STAT1 dysregulation. *J Clin Invest*.



- 1 Pagani, A., Nai, A., Corna, G., Bosurgi, L., Rovere-Querini, P., Camaschella, C., and Silvestri, L.  
2 (2011). Low hepcidin accounts for the proinflammatory status associated with iron deficiency. *Blood*  
3 *118*, 736-746.
- 4 Park, T.J., Park, J.H., Lee, G.S., Lee, J.Y., Shin, J.H., Kim, M.W., Kim, Y.S., Kim, J.Y., Oh, K.J., Han,  
5 B.S., *et al.* (2019). Quantitative proteomic analyses reveal that GPX4 downregulation during myocardial  
6 infarction contributes to ferroptosis in cardiomyocytes. *Cell Death Dis* *10*, 835.
- 7 Pek, R.H., Yuan, X., Rietzschel, N., Zhang, J., Jackson, L., Nishibori, E., Ribeiro, A., Simmons, W.,  
8 Jagadeesh, J., Sugimoto, H., *et al.* (2019). Hemozoin produced by mammals confers heme tolerance.  
9 *Elife* *8*.
- 10 Peters, L.L., Tsaih, S.W., and Yuan, R. (2008). Modeling Anemia of Aging in Inbred Mouse Strains.  
11 *Blood* *112*, 1181-1182.
- 12 Pfefferle, M., Ingoglia, G., Schaer, C.A., Yalamanoglu, A., Buzzi, R., Dubach, I.L., Tan, G., Lopez-  
13 Cano, E.Y., Schulthess, N., Hansen, K., *et al.* (2020). Hemolysis transforms liver macrophages into  
14 antiinflammatory erythrophagocytes. *J Clin Invest* *130*, 5576-5590.
- 15 Picelli, S., Bjorklund, A.K., Faridani, O.R., Sagasser, S., Winberg, G., and Sandberg, R. (2013). Smart-  
16 seq2 for sensitive full-length transcriptome profiling in single cells. *Nat Methods* *10*, 1096-1098.
- 17 Qi, L., Tsai, B., and Arvan, P. (2017). New Insights into the Physiological Role of Endoplasmic  
18 Reticulum-Associated Degradation. *Trends Cell Biol* *27*, 430-440.
- 19 Raven, E.P., Lu, P.H., Tishler, T.A., Heydari, P., and Bartzokis, G. (2013). Increased iron levels and  
20 decreased tissue integrity in hippocampus of Alzheimer's disease detected in vivo with magnetic  
21 resonance imaging. *J Alzheimers Dis* *37*, 127-136.
- 22 Sangkhae, V., Fisher, A.L., Wong, S., Koenig, M.D., Tussing-Humphreys, L., Chu, A., Lelic, M., Ganz,  
23 T., and Nemeth, E. (2019). Effects of maternal iron status on placental and fetal iron homeostasis. *J Clin*  
24 *Invest*.
- 25 Sanyear, C., Butthep, P., Eamsaard, W., Fucharoen, S., Svasti, S., and Masaratana, P. (2020). Iron  
26 homeostasis in a mouse model of thalassemia intermedia is altered between adolescence and adulthood.  
27 *PeerJ* *8*, e8802.
- 28 Slusarczyk, P., and Mleczko-Sanecka, K. (2021). The Multiple Facets of Iron Recycling. *Genes (Basel)*  
29 *12*.
- 30 Sorbie, J., and Valberg, L.S. (1974). Iron balance in the mouse. *Lab Anim Sci* *24*, 900-904.
- 31 Sukumaran, A., Chang, J., Han, M., Mintri, S., Khaw, B.A., and Kim, J. (2017). Iron overload  
32 exacerbates age-associated cardiac hypertrophy in a mouse model of hemochromatosis. *Sci Rep* *7*, 5756.
- 33 Suliman, H.B., Keenan, J.E., and Piantadosi, C.A. (2017). Mitochondrial quality-control dysregulation  
34 in conditional HO-1(-/-) mice. *JCI Insight* *2*, e89676.
- 35 Theurl, I., Hilgendorf, I., Nairz, M., Tymoszyk, P., Haschka, D., Asshoff, M., He, S., Gerhardt, L.M.,  
36 Holderried, T.A., Seifert, M., *et al.* (2016). On-demand erythrocyte disposal and iron recycling requires  
37 transient macrophages in the liver. *Nat Med* *22*, 945-951.
- 38 Torrance, J.D., and Bothwell, T.H. (1968). A simple technique for measuring storage iron concentrations  
39 in formalinised liver samples. *The South African journal of medical sciences* *33*, 9-11.
- 40 Tyanova, S., Temu, T., Sinitcyn, P., Carlson, A., Hein, M.Y., Geiger, T., Mann, M., and Cox, J. (2016).  
41 The Perseus computational platform for comprehensive analysis of (prote)omics data. *Nat Methods* *13*,  
42 731-740.
- 43 Uversky, V.N. (2009). Intrinsic disorder in proteins associated with neurodegenerative diseases. *Front*  
44 *Biosci (Landmark Ed)* *14*, 5188-5238.
- 45 Vadolas, J., Ng, G.Z., Kysenius, K., Crouch, P.J., Dames, S., Eisermann, M., Nualkaew, T., Vilcassim,  
46 S., Schaeper, U., and Grigoriadis, G. (2021). SLN124, a GalNac-siRNA targeting transmembrane serine  
47 protease 6, in combination with deferiprone therapy reduces ineffective erythropoiesis and hepatic iron-  
48 overload in a mouse model of beta-thalassaemia. *Br J Haematol* *194*, 200-210.

- 1 van Bergen, J.M., Li, X., Hua, J., Schreiner, S.J., Steininger, S.C., Quevenco, F.C., Wyss, M., Gietl,  
2 A.F., Treyer, V., Leh, S.E., *et al.* (2016). Colocalization of cerebral iron with Amyloid beta in Mild  
3 Cognitive Impairment. *Sci Rep* 6, 35514.
- 4 Vijayan, V., Wagener, F., and Immenschuh, S. (2018). The macrophage heme-heme oxygenase-1  
5 system and its role in inflammation. *Biochem Pharmacol* 153, 159-167.
- 6 Ward, R.J., Legssyer, R., Henry, C., and Crichton, R.R. (2000). Does the haemosiderin iron core  
7 determine its potential for chelation and the development of iron-induced tissue damage? *J Inorg*  
8 *Biochem* 79, 311-317.
- 9 Xu, J., Knutson, M.D., Carter, C.S., and Leeuwenburgh, C. (2008). Iron accumulation with age,  
10 oxidative stress and functional decline. *PLoS One* 3, e2865.
- 11 Yan, H.F., Zou, T., Tuo, Q.Z., Xu, S., Li, H., Belaidi, A.A., and Lei, P. (2021). Ferroptosis: mechanisms  
12 and links with diseases. *Signal Transduct Target Ther* 6, 49.
- 13 Yona, S., Kim, K.W., Wolf, Y., Mildner, A., Varol, D., Breker, M., Strauss-Ayali, D., Viukov, S.,  
14 Guilliams, M., Misharin, A., *et al.* (2013). Fate mapping reveals origins and dynamics of monocytes and  
15 tissue macrophages under homeostasis. *Immunity* 38, 79-91.
- 16 Youssef, L.A., Rebbaa, A., Pampou, S., Weisberg, S.P., Stockwell, B.R., Hod, E.A., and Spitalnik, S.L.  
17 (2018). Increased erythrophagocytosis induces ferroptosis in red pulp macrophages in a mouse model  
18 of transfusion. *Blood* 131, 2581-2593.
- 19 Zhang, D.L., Wu, J., Shah, B.N., Greutelaers, K.C., Ghosh, M.C., Ollivierre, H., Su, X.Z., Thuma, P.E.,  
20 Bedu-Addo, G., Mockenhaupt, F.P., *et al.* (2018). Erythrocytic ferroportin reduces intracellular iron  
21 accumulation, hemolysis, and malaria risk. *Science* 359, 1520-1523.
- 22 Zhang, Z., Zhang, F., An, P., Guo, X., Shen, Y., Tao, Y., Wu, Q., Zhang, Y., Yu, Y., Ning, B., *et al.*  
23 (2011). Ferroportin1 deficiency in mouse macrophages impairs iron homeostasis and inflammatory  
24 responses. *Blood* 118, 1912-1922.
- 25
